# Supplementary material
Source: publisher figshare collection journal article supplement (https://acs.figshare.com/ndownloader/files/11974232)
Supplement: Supplementary file 1 [file 11974232]

## Sheet: P14O1
Contigs ID	ORFs ID	E-value	Accession_number	% identity	% similarity	description	Genus and species affiliation for top BLASTx hit (if known)	Phylum
P14O1	ORF1	No significant hit
P14O1	ORF2	2e-124	AMV32467	0.562	0.709	hypothetical protein VN12_10105	Pirellula sp. SH-Sr6A	Planctomycetes
P14O1	ORF3	0	CCD02556	0.69	0.785	alpha amylase catalytic region (plasmid)	Azospirillum brasilense Sp245	Proteobacteria
P14O1	ORF4	0	AMV22414	0.855	0.915	Mannosyl oligosaccharide glucosidase	Planctomyces sp. SH-PL14	Planctomycetes
P14O1	ORF5	1e-139	ADB15451	0.589	0.727	6-phosphofructokinase	Pirellula staleyi DSM 6068	Planctomycetes
P14O1	ORF6	4e-168	AAZ60579	0.649	0.77	Sulphate anion transporter	Ralstonia eutropha JMP134	Proteobacteria
P14O1	ORF7	No significant hit
P14O1	ORF8	0	ADB16960	0.779	0.877	phosphoenolpyruvate carboxykinase (ATP)	Pirellula staleyi DSM 6068	Planctomycetes
P14O1	ORF9	1e-115	ABQ26823	0.793	0.914	protein of unknown function DUF344	Geobacter uraniireducens Rf4	Proteobacteria
P14O1	ORF10	2e-116	AMV19962	0.56	0.723	2-dehydro-3-deoxygluconokinase	Planctomyces sp. SH-PL14	Planctomycetes
P14O1	ORF11	2e-55	AMV39655	0.321	0.505	hypothetical protein VT85_19640	Planctomyces sp. SH-PL62	Planctomycetes
P14O1	ORF12	1e-19	ADB18335	0.303	0.5	heme-binding protein	Pirellula staleyi DSM 6068	Planctomycetes
P14O1	ORF13	6e-124	AMV39655	0.482	0.613	hypothetical protein VT85_19640	Planctomyces sp. SH-PL62	Planctomycetes
P14O1	ORF14	No significant hit
P14O1	ORF15	No significant hit
P14O1	ORF16	4e-80	ADB18690	0.401	0.594	hypothetical protein Psta_4037	Pirellula staleyi DSM 6068	Planctomycetes
P14O1	ORF17	6e-50	ADB18689	0.425	0.568	hypothetical protein Psta_4036	Pirellula staleyi DSM 6068	Planctomycetes
P14O1	ORF18	8e-20	ADB18689	0.464	0.609	hypothetical protein Psta_4036	Pirellula staleyi DSM 6068	Planctomycetes
P14O1	ORF19	1e-42	EDJ38067	0.367	0.539	hypothetical protein GOS_1705622	marine metagenome	Others
P14O1	ORF20	0	ADB15179	0.772	0.882	two component, sigma54 specific, transcriptional regulator, Fis family	Pirellula staleyi DSM 6068	Planctomycetes
P14O1	ORF21	3e-05	AFN79604	0.489	0.702	hypothetical protein PSJM300_17755	Pseudomonas stutzeri DSM 10701	Proteobacteria
P14O1	ORF22	4e-19	BAM05304	0.38	0.543	hypothetical protein PSMK_31450	Phycisphaera mikurensis NBRC 102666	Planctomycetes
P14O1	ORF23	No significant hit
P14O1	ORF24	9e-10	AJH02161	0.314	0.562	hypothetical protein LF65_05654	Clostridium beijerinckii	Firmicutes
P14O1	ORF25	No significant hit
P14O1	ORF26	No significant hit
P14O1	ORF27	8e-11	ACY14406	0.733	0.889	ATP-dependent helicase HrpB	Haliangium ochraceum DSM 14365	Proteobacteria
P14O1	ORF28	5e-13	AGX35219	1	1	cell wall structural complex MreBCD transmembrane component MreD	synthetic Escherichia coli C321.deltaA	Proteobacteria
P14O1	ORF29	7e-16	EGI16655	1	1	sensor kinase DpiB (Sensor kinase citA)	Escherichia coli M605	Proteobacteria
P14O1	ORF30	4e-12	EIP99213	0.689	0.8	FAD binding protein	Opitutaceae bacterium TAV1	Verrucomicrobia
P14O1	ORF31	2e-99	AHF93025	0.578	0.706	glucose-inhibited division protein A	Opitutaceae bacterium TAV5	Verrucomicrobia
P14O1	ORF32	4e-109	ADY62071	0.434	0.657	hypothetical protein Plabr_4500	Rubinisphaera brasiliensis DSM 5305	Planctomycetes
P14O1	ORF33	2e-06	AMV21865	0.38	0.582	hypothetical protein VT03_28445	Planctomyces sp. SH-PL14	Planctomycetes
P14O1	ORF34	No significant hit
P14O1	ORF35	2e-172	EDJ49981	0.883	0.973	hypothetical protein GOS_1684498	marine metagenome	Others
P14O1	ORF36	2e-49	EBT43766	0.619	0.791	hypothetical protein GOS_7273801 partial	marine metagenome	Others
P14O1	ORF37	3e-39	ADB18392	0.393	0.573	hypothetical protein Psta_3737	Pirellula staleyi DSM 6068	Planctomycetes
P14O1	ORF38	3e-09	ADB15795	0.281	0.481	hypothetical protein Psta_1112	Pirellula staleyi DSM 6068	Planctomycetes
P14O1	ORF39	3e-06	EDX77350	0.337	0.539	hypothetical protein MC7420_487	Coleofasciculus chthonoplastes PCC 7420	Cyanobacteria
P14O1	ORF40	4e-21	GAK55353	0.457	0.63	plasmid stabilization system protein RelE/ParE famil	bacterium UASB270	Others
P14O1	ORF41	No significant hit
P14O1	ORF42	2e-133	ADB18883	0.679	0.815	aminotransferase class I and II	Pirellula staleyi DSM 6068	Planctomycetes
P14O1	ORF43	9e-30	AMV16800	0.629	0.775	Putative N-acetyl-LL-diaminopimelate aminotransferase	Planctomyces sp. SH-PL14	Planctomycetes
P14O1	ORF44	1e-19	ABO49928	0.281	0.422	phosphomannomutase	Desulfotomaculum reducens MI-1	Proteobacteria
P14O1	ORF45	2e-19	AMV19494	0.638	0.787	ATP-dependent RNA helicase HrpB	Planctomyces sp. SH-PL14	Proteobacteria
P14O1	ORF46	0	AMV19494	0.542	0.698	ATP-dependent RNA helicase HrpB	Planctomyces sp. SH-PL14	Proteobacteria
P14O1	ORF47	8e-130	AKU13063	0.711	0.838	acetoacetyl-CoA synthetase	Azoarcus sp. CIB	Proteobacteria
P14O1	ORF48	9e-149	ADE15594	0.616	0.754	acetoacetyl-CoA synthase	Nitrosococcus halophilus Nc 4	Proteobacteria
P14O1	ORF49	2e-14	ADY58214	0.522	0.667	hypothetical protein Plabr_0587	Rubinisphaera brasiliensis DSM 5305	Planctomycetes
P14O1	ORF50	3e-37	CAD72603	0.342	0.571	probable cytidylate kinase	Rhodopirellula baltica SH 1	Planctomycetes
P14O1	ORF51	1e-12	ACN13139	0.278	0.464	hypothetical protein HRM2_00160	Desulfobacterium autotrophicum HRM2	Proteobacteria

## Sheet: P18N22
Contigs ID	ORFs ID	E-value	Accession_number	% identity	% similarity	description	Genus and species affiliation for top BLASTx hit (if known)	Phylum
P18N22	ORF1	1e-40	CDF86805	0.53	0.685	group 1 glycosyl transferase	Pseudomonas knackmussii B13	Proteobacteria
P18N22	ORF2	1e-74	ACB77247	0.377	0.523	glycosyl transferase family 2	Opitutus terrae PB90-1	Verrucomicrobia
P18N22	ORF3	4e-159	CEG62327	0.642	0.792	GDP-mannose 4 6-dehydratase	Tatlockia micdadei	Proteobacteria
P18N22	ORF4	0	BAP57274	0.56	0.735	bacterial type II secretion system protein E	Thioploca ingrica	Firmicutes
P18N22	ORF5	1e-138	ABE48629	0.541	0.706	DNA polymerase I	Methylobacillus flagellatus KT	Proteobacteria
P18N22	ORF6	4e-41	ABX35641	0.694	0.786	Secreted repeat-domain containing protein	Delftia acidovorans SPH-1	Proteobacteria
P18N22	ORF7	1e-49	ABD70265	0.511	0.652	sigma-24 (FecI-like)	Rhodoferax ferrireducens T118	Proteobacteria
P18N22	ORF8	5e-57	ADU37048	0.482	0.597	putative transmembrane anti-sigma factor	Variovorax paradoxus EPS	Proteobacteria
P18N22	ORF9	2e-39	ABM35541	0.524	0.714	cytochrome c class II	Polaromonas naphthalenivorans CJ2	Proteobacteria
P18N22	ORF10	8e-50	AMS32890	0.466	0.627	hypothetical protein AEM42_11765	Betaproteobacteria bacterium UKL13-2	Proteobacteria
P18N22	ORF11	8e-174	ABM93392	0.441	0.584	patatin-like phospholipase	Methylibium petroleiphilum PM1	Proteobacteria
P18N22	ORF12	6e-146	BAO27987	0.536	0.663	D-alanyl-D-alanine carboxypeptidase/D-alanyl-D-alanine-endopeptidase	Sulfuritalea hydrogenivorans sk43H	Proteobacteria
P18N22	ORF13	5e-87	ECF13143	0.631	0.775	hypothetical protein GOS_3950278 partial	marine metagenome	Others
P18N22	ORF14	1e-131	AMS31530	0.76	0.906	transcriptional regulator	Betaproteobacteria bacterium UKL13-2	Proteobacteria
P18N22	ORF15	4e-30	ALD91718	0.487	0.699	putative membrane protein	Cupriavidus gilardii CR3	Proteobacteria
P18N22	ORF16	3e-53	BAU44273	0.55	0.705	Cupin domain protein	Leptolyngbya sp. O-77	Cyanobacteria
P18N22	ORF17	0	AEJ01871	0.772	0.889	3-octaprenyl-4-hydroxybenzoate carboxy-lyase	Nitrosomonas sp. Is79A3	Proteobacteria
P18N22	ORF18	2e-172	ALP68408	0.724	0.822	chromate transporter (plasmid)	Paraburkholderia caribensis	Proteobacteria
P18N22	ORF19	2e-84	AMN45291	0.603	0.668	chromate resistance regulator ChrB	Rhodoplanes sp. Z2-YC6860	Proteobacteria
P18N22	ORF20	5e-69	ABE50743	0.522	0.688	protein of unknown function DUF6 transmembrane	Methylobacillus flagellatus KT	Proteobacteria
P18N22	ORF21	3e-35	CAI08930	0.497	0.576	hypothetical protein ebA4929	Aromatoleum aromaticum EbN1	Proteobacteria
P18N22	ORF22	1e-174	BAL26308	0.703	0.811	phenylacetate-CoA ligase	Azoarcus sp. KH32C	Proteobacteria
P18N22	ORF23	2e-74	AJZ62610	0.763	0.878	glyoxalase-like domain protein	Paraburkholderia fungorum	Proteobacteria
P18N22	ORF24	2e-153	AEV25515	0.795	0.898	ABC-type branched-chain amino acid transport systems ATPase component	Dechlorosoma suillum PS	Proteobacteria
P18N22	ORF25	0	AKU23183	0.722	0.845	ABC transporter permease	Massilia sp. NR 4-1	Proteobacteria
P18N22	ORF26	0	AKU23182	0.824	0.915	ABC transporter permease	Massilia sp. NR 4-1	Proteobacteria
P18N22	ORF27	5e-144	AKU23181	0.799	0.893	ABC transporter permease	Massilia sp. NR 4-1	Proteobacteria
P18N22	ORF28	3e-142	AKU23180	0.799	0.9	ABC transporter	Massilia sp. NR 4-1	Proteobacteria
P18N22	ORF29	0	BAO28439	0.726	0.841	AMP-dependent synthetase/ligase	Sulfuritalea hydrogenivorans sk43H	Proteobacteria
P18N22	ORF30	6e-122	BAN36373	0.509	0.669	apolipoprotein N-acyltransferase	Sulfuricella denitrificans skB26	Proteobacteria
P18N22	ORF31	3e-131	AMS33934	0.686	0.861	cation transporter	Betaproteobacteria bacterium UKL13-2	Proteobacteria
P18N22	ORF32	1e-49	BAN36391	0.535	0.684	hypothetical protein SCD_n02589	Sulfuricella denitrificans skB26	Proteobacteria
P18N22	ORF33	3e-148	ACV34576	0.696	0.792	PhoH family protein	Candidatus Accumulibacter phosphatis clade IIA str. UW-1	Proteobacteria
P18N22	ORF34	0	AMS33771	0.574	0.714	hypothetical protein AEM42_09560	Betaproteobacteria bacterium UKL13-2	Proteobacteria
P18N22	ORF35	0	AOB30048	0.718	0.833	(dimethylallyl)adenosine tRNA methylthiotransferase	Bordetella sp. H567	Proteobacteria
P18N22	ORF36	4e-132	BAN34178	0.705	0.851	acetylglutamate kinase	Sulfuricella denitrificans skB26	Proteobacteria
P18N22	ORF37	2e-79	ADE10976	0.695	0.777	transcriptional regulator TetR family	Sideroxydans lithotrophicus ES-1	Proteobacteria
P18N22	ORF38	3e-104	GAO36548	0.622	0.793	molybdopterin biosynthesis protein MoeB	Sulfuricella sp. T08	Proteobacteria
P18N22	ORF39	4e-165	GAO36549	0.58	0.733	peptidase S41	Sulfuricella sp. T08	Proteobacteria
P18N22	ORF40	9e-53	ABE50456	0.387	0.594	peptidase M23B	Methylobacillus flagellatus KT	Proteobacteria
P18N22	ORF41	0	ADE12845	0.62	0.76	Phosphoglycerate mutase, 2,3-bisphosphoglycerate-independent	Sideroxydans lithotrophicus ES-1	Proteobacteria
P18N22	ORF42	2e-30	BAN36493	0.415	0.667	rhodanese domain protein	Sulfuricella denitrificans skB26	Proteobacteria
P18N22	ORF43	2e-40	BAO28525	0.775	0.938	glutaredoxin	Sulfuritalea hydrogenivorans sk43H	Proteobacteria
P18N22	ORF44	2e-52	BAN36490	0.638	0.835	preprotein translocase subunit SecB	Sulfuricella denitrificans skB26	Proteobacteria
P18N22	ORF45	2e-31	EBY92185	0.532	0.69	hypothetical protein GOS_3912595	marine metagenome	Others
P18N22	ORF46	8e-161	AMS32376	0.687	0.801	segregation protein A	Betaproteobacteria bacterium UKL13-2	Proteobacteria
P18N22	ORF47	2e-70	AEF88500	0.486	0.649	alpha/beta hydrolase fold protein	Delftia sp. Cs1-4	Proteobacteria
P18N22	ORF48	8e-178	EHJ47821	0.598	0.713	DNA repair protein and transcriptional regulator AraC family	Desulfovibrio sp. FW1012B	Proteobacteria
P18N22	ORF49	4e-44	ABE43573	0.516	0.677	methylated-DNA--protein-cysteine methyltransferase	Polaromonas sp. JS666	Proteobacteria
P18N22	ORF50	1e-84	BAL25252	0.561	0.74	transporter drug/metabolite exporter family	Azoarcus sp. KH32C	Proteobacteria
P18N22	ORF51	No significant hit
P18N22	ORF52	0	CAL92697	0.707	0.828	rtcB protein	Azoarcus sp. BH72	Proteobacteria
P18N22	ORF53	3e-65	CAI08336	0.557	0.714	hypothetical protein ebA3896	Aromatoleum aromaticum EbN1	Proteobacteria
P18N22	ORF54	6e-14	ABB75173	0.426	0.618	possible transmembrane protein	Nitrosospira multiformis ATCC 25196	Proteobacteria
P18N22	ORF55	2e-96	CUW41850	0.578	0.696	Cobalt-nickel-resistance system transmembrane protein (plasmid)	Magnetospirillum sp. XM-1	Proteobacteria
P18N22	ORF56	No significant hit
P18N22	ORF57	No significant hit
P18N22	ORF58	8e-44	ALK96513	0.621	0.806	flagellar motor protein MotB	Massilia sp. WG5	Proteobacteria
P18N22	ORF59	4e-113	BAT58812	0.784	0.884	putative aliphatic sulfonates transport permease protein SsuC	Variibacter gotjawalensis	Proteobacteria
P18N22	ORF60	3e-142	AGD23862	0.734	0.846	Sequence 21318 from patent US 8343764		Others
P18N22	ORF61	2e-112	CAP41591	0.561	0.73	putative secreted protein	Bordetella petrii	Proteobacteria
P18N22	ORF62	2e-156	CCN18405	0.692	0.824	putative exported protein	Bordetella bronchiseptica MO211	Proteobacteria
P18N22	ORF63	0	BAT58809	0.664	0.803	alcohol dehydrogenase acceptor		Proteobacteria
P18N22	ORF64	2e-62	AIA14975	0.764	0.862	Uncharacterized protein family UPF0047	uncultured bacterium	Others
P18N22	ORF65	0	AKJ31423	0.737	0.838	AMP nucleosidase		Proteobacteria
P18N22	ORF66	No significant hit

## Sheet: P20I6
Contigs ID	ORFs ID	E-value	Accession_number	% identity	% similarity	description	Genus and species affiliation for top BLASTx hit (if known)	Phylum
P20I6	ORF1	6e-19	ANQ87015	0.623	0.836	putative alkaline phosphatase	Azoarcus olearius	Proteobacteria
P20I6	ORF2	9e-104	BAL54615	0.541	0.674	hypothetical conserved protein	uncultured Acidobacteria bacterium	Acidobacteria
P20I6	ORF3	3e-73	ALO45241	0.483	0.662	hypothetical protein PS2015_558	Pseudohongiella spirulinae	Proteobacteria
P20I6	ORF4	4e-117	ALS92040	0.473	0.657	rsmB: ribosomal RNA small subunit methyltransferase partial	uncultured bacterium	Others
P20I6	ORF5	3e-05	EOY47149	0.337	0.525	putative serine/threonine-protein kinase pknL	Streptomyces lividans 1326	Actinobacteria
P20I6	ORF6	2e-68	ADB46724	0.569	0.718	ribulose-phosphate 3-epimerase	Acidaminococcus fermentans DSM 20731	Firmicutes
P20I6	ORF7	1e-53	AEP12169	0.409	0.581	outer membrane assembly lipoprotein YfiO	Chloracidobacterium thermophilum B	Acidobacteria
P20I6	ORF8	No significant hit
P20I6	ORF9	2e-94	AEP11922	0.528	0.677	Peptidase family M48	Chloracidobacterium thermophilum B	Acidobacteria
P20I6	ORF10	3e-50	AEP11679	0.25	0.419	hypothetical protein Cabther_A0922	Chloracidobacterium thermophilum B	Acidobacteria
P20I6	ORF11	2e-39	ABB13945	0.363	0.557	conserved hypothetical protein	Carboxydothermus hydrogenoformans Z-2901	Firmicutes
P20I6	ORF12	No significant hit
P20I6	ORF13	2e-10	AEP11168	0.603	0.778	Fe2+/Zn2+ uptake regulation protein	Chloracidobacterium thermophilum B	Acidobacteria
P20I6	ORF14	No significant hit
P20I6	ORF15	No significant hit
P20I6	ORF16	2e-53	AGC44534	0.299	0.517	mechanosensitive ion channel/cyclic nucleotide-binding domain-containing protein	Myxococcus stipitatus DSM 14675	Proteobacteria
P20I6	ORF17	8e-147	ACZ43238	0.569	0.762	natural resistance-associated macrophage protein	Thermobaculum terrenum ATCC BAA-798	Cloroflexi
P20I6	ORF18	0	AEP13575	0.57	0.72	gamma-glutamyltransferase 1, Threonine peptidase, MEROPS family T03	Chloracidobacterium thermophilum B	Acidobacteria
P20I6	ORF19	5e-11	ALS90939	0.369	0.525	zinc-ribbon domain protein	uncultured bacterium	Others
P20I6	ORF20	5e-15	ALS90939	0.314	0.505	zinc-ribbon domain protein	uncultured bacterium	Others
P20I6	ORF21	1e-12	AEP12025	0.32	0.503	hypothetical protein Cabther_A1272	Chloracidobacterium thermophilum B	Acidobacteria
P20I6	ORF22	2e-14	ABC98769	0.387	0.588	putative lipoprotein	Synechococcus sp. JA-3-3Ab	Cyanobacteria
P20I6	ORF23	1e-19	ABX02891	0.667	0.762	protein of unknown function DUF74	Herpetosiphon aurantiacus DSM 785	Chloroflexi
P20I6	ORF24	2e-162	GAO76382	0.647	0.816	threonine dehydratase	Meiothermus ruber H328	Deinococcus-Thermus
P20I6	ORF25	9e-122	AEP11618	0.645	0.814	Membrane protease subunit	Chloracidobacterium thermophilum B	Acidobacteria
P20I6	ORF26	3e-85	AKX01305	0.818	0.883	Sequence 5592 from patent US 8962800		Others
P20I6	ORF27	2e-32	ACZ39331	0.36	0.54	2'-5' RNA ligase	Sphaerobacter thermophilus DSM 20745	Chloroflexi
P20I6	ORF28	6e-59	AMY09639	0.363	0.523	putative aminodeoxychorismate lyase	Acidobacteria bacterium DSM 100886	Acidobacteria
P20I6	ORF29	3e-57	AEP11122	0.384	0.56	HAD-superfamily hydrolase subfamily IIB	Chloracidobacterium thermophilum B	Acidobacteria
P20I6	ORF30	2e-48	AEP12454	0.611	0.713	Peptidyl-prolyl cis-trans isomerase (rotamase) - cyclophilin family	Chloracidobacterium thermophilum B	Acidobacteria
P20I6	ORF31	8e-60	CEJ74943	0.651	0.779	D-tyrosyl-tRNA(Tyr) deacylase	Clostridium sordellii	Firmicutes
P20I6	ORF32	1e-30	ECA25779	0.438	0.619	hypothetical protein GOS_5572851 partial	marine metagenome	Others
P20I6	ORF33	0	ADV82453	0.571	0.728	Alpha-mannosidase	Terriglobus saanensis SP1PR4	Acidobacteria
P20I6	ORF34	4e-140	AMY11390	0.688	0.824	D-allose-binding periplasmic protein precursor	Acidobacteria bacterium DSM 100886	Acidobacteria
P20I6	ORF35	2e-30	BAN70061	0.41	0.613	high-affinity nickel-transporter	endosymbiont of unidentified scaly snail isolate Monju	Others
P20I6	ORF36	2e-88	AEP13646	0.308	0.472	hypothetical protein Cabther_B0648	Chloracidobacterium thermophilum B	Acidobacteria
P20I6	ORF37	0	ACB75966	0.652	0.791	aconitate hydratase 1	Opitutus terrae PB90-1	Verrucomicrobia
P20I6	ORF38	No significant hit
P20I6	ORF39	7e-41	AEP12997	0.453	0.616	Soluble lytic murein transglycosylase and related regulatory proteins (some contain LysM/invasin domains)	Chloracidobacterium thermophilum B	Acidobacteria
P20I6	ORF40	5e-63	GAF27323	0.436	0.622	sugar phosphate isomerases/epimerases	Moorella thermoacetica Y72	Firmicutes
P20I6	ORF41	5e-89	ADP74918	0.431	0.633	oxidoreductase domain protein	Geobacillus sp. Y4.1MC1	Firmicutes
P20I6	ORF42	No significant hit
P20I6	ORF43	3e-23	ADW68378	0.289	0.479	hypothetical protein AciX9_1316	Granulicella tundricola MP5ACTX9	Acidobacteria
P20I6	ORF44	No significant hit
P20I6	ORF45	0	ADU37788	0.698	0.838	putative circadian clock protein KaiC	Variovorax paradoxus EPS	Proteobacteria
P20I6	ORF46	0	BAM00950	0.736	0.848	urocanate hydratase	Caldilinea aerophila DSM 14535 = NBRC 104270	Chloroflexi
P20I6	ORF47	2e-63	AGA79552	0.439	0.613	putative membrane protein (DUF2339)	Echinicola vietnamensis DSM 17526	Bacteroidetes
P20I6	ORF48	2e-46	AOC95743	0.587	0.746	YciI-like protein	Flavobacterium johnsoniae	Bacteroidetes
P20I6	ORF49	6e-137	BAM00787	0.505	0.689	imidazolonepropionase	Caldilinea aerophila DSM 14535 = NBRC 104270	Chloroflexi
P20I6	ORF50	0	BAM00269	0.687	0.825	histidine ammonia-lyase	Caldilinea aerophila DSM 14535 = NBRC 104270	Chloroflexi
P20I6	ORF51	2e-67	ALJ00988	0.456	0.649	hypothetical protein DC20_20835	Rufibacter tibetensis	Bacteroidetes
P20I6	ORF52	1e-87	AGB85075	0.511	0.644	hypothetical protein pA2Cu2_5 (plasmid)	uncultured soil bacterium	Others
P20I6	ORF53	5e-53	AGB85074	0.5	0.618	PepM (plasmid)	uncultured soil bacterium	Others
P20I6	ORF54	7e-22	ECG97197	0.376	0.549	hypothetical protein GOS_3633705	marine metagenome	Others
P20I6	ORF55	3e-23	AMW17351	0.504	0.652	hypothetical protein A4U84_09200	Haemophilus parasuis	Proteobacteria
P20I6	ORF56	2e-10	EEY95160	0.536	0.714	hypothetical protein HMPREF0016_02833	Acinetobacter johnsonii SH046	Proteobacteria
P20I6	ORF57	6e-23	AEB67384	0.309	0.534	hypothetical protein MCON_0545	Methanosaeta concilii GP6	Euryarchaeota
P20I6	ORF58	No significant hit
P20I6	ORF59	No significant hit
P20I6	ORF60	No significant hit
P20I6	ORF61	No significant hit
P20I6	ORF62	No significant hit
P20I6	ORF63	0.0003	ANU75948	0.391	0.674	transposase	Blautia sp. YL58	Firmicutes
P20I6	ORF64	No significant hit
P20I6	ORF65	No significant hit
P20I6	ORF66	No significant hit
P20I6	ORF67	No significant hit
P20I6	ORF68	No significant hit
P20I6	ORF69	3e-07	ANY81661	0.5	0.712	hypothetical protein BB934_08255	Microvirga sp. V5/3M	Proteobacteria
P20I6	ORF70	No significant hit
P20I6	ORF71	6e-110	ABZ06035	0.43	0.579	hypothetical protein ALOHA_HF4000005H07ctg1g3	uncultured marine microorganism HF4000_005H07	Others
P20I6	ORF72	No significant hit
P20I6	ORF73	No significant hit
P20I6	ORF74	No significant hit
P20I6	ORF75	No significant hit
P20I6	ORF76	No significant hit
P20I6	ORF77	No significant hit
P20I6	ORF78	2e-11	ALW86331	0.424	0.588	hypothetical protein AUC43_15310	Hymenobacter sp. DG5B	Bacteroidetes
P20I6	ORF79	No significant hit
P20I6	ORF80	No significant hit
P20I6	ORF81	8e-53	AEE98024	0.413	0.608	phage tail tape measure protein TP901 family	Mahella australiensis 50-1 BON	Firmicutes
P20I6	ORF82	No significant hit
P20I6	ORF83	5e-08	EIC23373	0.257	0.507	hypothetical protein Thi970DRAFT_01035	Thiorhodovibrio sp. 970	Proteobacteria
P20I6	ORF84	No significant hit
P20I6	ORF85	5e-86	ALW84323	0.352	0.496	hypothetical protein AUC43_03970	Hymenobacter sp. DG5B	Bacteroidetes
P20I6	ORF86	No significant hit
P20I6	ORF87	9e-11	AER55854	0.389	0.584	hypothetical protein DSC_06015	Pseudoxanthomonas spadix BD-a59	Proteobacteria
P20I6	ORF88	No significant hit
P20I6	ORF89	2e-44	AHG93530	0.272	0.452	transcriptional regulator domain-containing protein (plasmid)	Gemmatirosa kalamazoonesis	Gemmatimonadetes
P20I6	ORF90	No significant hit
P20I6	ORF91	8e-16	AEP11041	0.345	0.531	von Willebrand factor type A domain protein	Chloracidobacterium thermophilum B	Acidobacteria
P20I6	ORF92	4e-73	AMY09958	0.6	0.76	hypothetical protein LuPra_03185	Acidobacteria bacterium DSM 100886	Acidobacteria
P20I6	ORF93	4e-72	ANA82625	0.396	0.592	penicillin-binding protein	Paenibacillus glucanolyticus	Firmicutes
P20I6	ORF94	4e-26	EBE73817	0.283	0.504	hypothetical protein GOS_9713459 partial	marine metagenome	Others
P20I6	ORF95	No significant hit
P20I6	ORF96	5e-38	ACZ43622	0.519	0.659	Micrococcal nuclease	Thermobaculum terrenum ATCC BAA-798	Chloroflexi
P20I6	ORF97	No significant hit
P20I6	ORF98	No significant hit
P20I6	ORF99	No significant hit
P20I6	ORF100	7e-07	AFD07279	0.344	0.531	cytochrome c mono- and diheme variants family	Solitalea canadensis DSM 3403	Bacteroidetes
P20I6	ORF101	No significant hit
P20I6	ORF102	0	AEP11829	0.45	0.604	Penicillin acylase like protein	Chloracidobacterium thermophilum B	Acidobacteria
P20I6	ORF103	2e-20	BAT71415	0.368	0.609	holliday junction resolvase	Thermosulfidibacter takaii ABI70S6	Aquificae
P20I6	ORF104	2e-89	BAL55522	0.479	0.675	carboxyl-terminal protease	uncultured Acidobacteria bacterium	Acidobacteria
P20I6	ORF105	2e-34	AGA30157	0.442	0.646	sortase-like acyltransferase	Singulisphaera acidiphila DSM 18658	Planctomycetes
P20I6	ORF106	No significant hit
P20I6	ORF107	1e-97	AEP11714	0.391	0.577	ABC-type transport system involved in cytochrome c biogenesis permease component	Chloracidobacterium thermophilum B	Acidobacteria
P20I6	ORF108	7e-10	AEP11892	0.36	0.528	ResB protein required for cytochrome c biosynthesis	Chloracidobacterium thermophilum B	Acidobacteria
P20I6	ORF109	3e-46	AMY11809	0.431	0.637	Oxygen sensor histidine kinase NreB	Acidobacteria bacterium DSM 100886	Acidobacteria
P20I6	ORF110	No significant hit
P20I6	ORF111	5e-11	EBX65039	0.291	0.492	hypothetical protein GOS_6554158 partial	marine metagenome	Others
P20I6	ORF112	2e-12	ABB15899	0.287	0.522	TPR domain protein	Carboxydothermus hydrogenoformans Z-2901	Firmicutes
P20I6	ORF113	7e-154	ABJ86819	0.636	0.779	alpha/beta hydrolase fold	Candidatus Solibacter usitatus Ellin6076	Acidobacteria
P20I6	ORF114	3e-66	ABZ35157	0.429	0.604	Sequence 9095 from patent US 7314974		Others
P20I6	ORF115	2e-78	EIE98340	0.576	0.704	uracil-DNA glycosylase family 4	Saccharomonospora glauca K62	Actinobacteria
P20I6	ORF116	8e-40	AEP11041	0.333	0.492	von Willebrand factor type A domain protein	Chloracidobacterium thermophilum B	Acidobacteria
P20I6	ORF117	0	AEP11065	0.561	0.708	threonyl-tRNA synthetase	Chloracidobacterium thermophilum B	Acidobacteria
P20I6	ORF118	4e-70	EBM42399	0.773	0.864	hypothetical protein GOS_8412340	marine metagenome	Others
P20I6	ORF119	7e-34	EBM42401	0.843	0.9	hypothetical protein GOS_8412344	marine metagenome	Others
P20I6	ORF120	4e-56	EBM42400	0.888	0.98	hypothetical protein GOS_8412342	marine metagenome	Others
P20I6	ORF121	2e-30	AMV25733	0.545	0.75	hypothetical protein VT84_15150	Gemmata sp. SH-PL17	Planctomycetes
P20I6	ORF122	2e-121	AGF56384	0.506	0.698	phenylalanine--tRNA ligase alpha subunit PheS	Clostridium saccharoperbutylacetonicum N1-4(HMT)	Firmicutes
P20I6	ORF123	5e-142	AEP12149	0.4	0.57	phenylalanyl-tRNA synthetase, beta subunit, non-spirochete bacterial	Chloracidobacterium thermophilum B	Acidobacteria
P20I6	ORF124	1e-08	AEP12150	0.494	0.69	hypothetical protein Cabther_A1399	Chloracidobacterium thermophilum B	Acidobacteria
P20I6	ORF125	1e-42	ECG02842	0.753	0.892	hypothetical protein GOS_3907968 partial	marine metagenome	Others
P20I6	ORF126	No significant hit
P20I6	ORF127	No significant hit
P20I6	ORF128	4e-36	ANN79830	0.836	0.973	ABC transporter ATP-binding protein	Bordetella flabilis	Proteobacteria
P20I6	ORF129	1e-57	BAT58812	0.735	0.826	putative aliphatic sulfonates transport permease protein SsuC	Variibacter gotjawalensis	Proteobacteria
P20I6	ORF130	7e-81	ALY13744	0.925	0.931	acetyl-CoA acetyltransferase	Escherichia coli	Proteobacteria

## Sheet: P22C4
Contigs ID	ORFs ID	E-value	Accession_number	% identity	% similarity	description	Genus and species affiliation for top BLASTx hit (if known)	Phylum	Genus and species affiliation for top BLAST hit (if known)
P22C4	ORF1	2e-131	ALF54030	0.684	0.852	oxidoreductase	Nostoc piscinale CENA21	Cyanobacteria
P22C4	ORF2	2e-35	CAQ84685	0.467	0.664	conserved hypothetical protein	Photorhabdus asymbiotica	Proteobacteria
P22C4	ORF3	7e-40	ACI20520	0.398	0.569	anthranilate synthase component II	Thermodesulfovibrio yellowstonii DSM 11347	Nitrospira
P22C4	ORF4	2e-61	AEP12846	0.398	0.542	Tetratricopeptide repeat protein	Chloracidobacterium thermophilum B	Acidobacteria
P22C4	ORF5	3e-33	AGC42528	0.324	0.496	hydrolase	Myxococcus stipitatus DSM 14675	Proteobacteria
P22C4	ORF6	0.0002	AFL86597	0.306	0.471	Coatomer epsilon subunit	Terriglobus roseus DSM 18391	Acidobacteria
P22C4	ORF7	No significant hit
P22C4	ORF8	6e-37	AEP12430	0.423	0.665	RNA polymerase sigma factor sigma-70 family	Chloracidobacterium thermophilum B	Acidobacteria
P22C4	ORF9	3e-05	ADU28458	0.297	0.514	putative transmembrane anti-sigma factor	Bacillus cellulosilyticus DSM 2522	Firmicutes
P22C4	ORF10	4e-22	AEP10902	0.543	0.713	TonB family C-terminal domain protein	Chloracidobacterium thermophilum B	Acidobacteria
P22C4	ORF11	0	ACU59251	0.673	0.797	conserved hypothetical protein	Chitinophaga pinensis DSM 2588	Bacteroidetes
P22C4	ORF12	0	ACU59250	0.756	0.851	thiamine pyrophosphate protein domain protein TPP-binding	Chitinophaga pinensis DSM 2588	Bacteroidetes
P22C4	ORF13	No significant hit
P22C4	ORF14	No significant hit
P22C4	ORF15	0	AMY10268	0.516	0.665	Cna protein B-type domain protein	Acidobacteria bacterium DSM 100886	Acidobacteria
P22C4	ORF16	No significant hit
P22C4	ORF17	1e-132	AHI28859	0.731	0.851	beta-lactamase	Marinobacter similis	Proteobacteria
P22C4	ORF18	5e-113	AGI72528	0.552	0.697	transposase	Octadecabacter arcticus 238	Proteobacteria
P22C4	ORF19	5e-63	AIY41669	0.782	0.857	putative signal peptide protein	Collimonas arenae	Proteobacteria
P22C4	ORF20	5e-62	ACN18082	0.454	0.643	two-component system sensor protein	uncultured bacterium BLR5	Others
P22C4	ORF21	2e-25	EBM21357	0.361	0.529	hypothetical protein GOS_8445293 partial	marine metagenome	Others
P22C4	ORF22	7e-44	EBM21357	0.519	0.695	hypothetical protein GOS_8445293 partial	marine metagenome	Others
P22C4	ORF23	No significant hit
P22C4	ORF24	2e-84	AIA10598	0.604	0.718	DNA/RNA non-specific endonuclease partial	uncultured bacterium	Others
P22C4	ORF25	0	AEK61983	0.775	0.878	Putative oxygenase	Collimonas fungivorans Ter331	Proteobacteria
P22C4	ORF26	8e-19	EIC29345	0.398	0.54	hypothetical protein Metal_1563	Methylomicrobium album BG8	Proteobacteria
P22C4	ORF27	No significant hit
P22C4	ORF28	0	SCF38641	0.49	0.701	molecular chaperone HtpG	Micromonospora echinospora	Actinobacteria
P22C4	ORF29	8e-93	ABA24327	0.571	0.718	Thioesterase	Anabaena variabilis ATCC 29413	Cyanobacteria
P22C4	ORF30	2e-122	EDX72615	0.528	0.719	Ornithine cyclodeaminase/mu-crystallin family	Coleofasciculus chthonoplastes PCC 7420	Cyanobacteria
P22C4	ORF31	2e-140	EDX72553	0.606	0.782	Pyridoxal-phosphate dependent enzyme superfamily	Coleofasciculus chthonoplastes PCC 7420	Cyanobacteria
P22C4	ORF32	2e-19	AGH96669	0.342	0.452	hypothetical protein A11Q_2453	Bdellovibrio exovorus JSS	Proteobacteria
P22C4	ORF33	0	ABF42460	0.454	0.655	ABC efflux pump inner membrane subunit	Candidatus Koribacter versatilis Ellin345	Acidobacteria
P22C4	ORF34	1e-27	AKG52843	0.334	0.484	hypothetical protein DGWBC_0155	Dehalogenimonas sp. WBC-2	Chloroflexi
P22C4	ORF35	4e-53	AEI43494	0.497	0.648	hypothetical protein KNP414_04969	Paenibacillus mucilaginosus KNP414	Firmicutes
P22C4	ORF36	0	ALA59619	0.697	0.834	putative thiamine pyrophosphate-containing protein YdaP	Nitrospira moscoviensis	Nitrospira
P22C4	ORF37	1e-53	BAC91493	0.714	0.848	gll3552	Gloeobacter violaceus PCC 7421	Cyanobacteria
P22C4	ORF38	2e-42	ADL12021	0.383	0.637	4-diphosphocytidyl-2C-methyl-D-erythritolsynthas e	Acetohalobium arabaticum DSM 5501	Firmicutes
P22C4	ORF39	No significant hit
P22C4	ORF40	0.0004	AGA30953	0.692	0.808	hypothetical protein Sinac_6893	Singulisphaera acidiphila DSM 18658	Planctomycetes
P22C4	ORF41	3e-69	GAK51192	0.567	0.706	probable RNA 2'-phosphotransferase	bacterium UASB14	Others
P22C4	ORF42	1e-75	BAL58254	0.443	0.628	hypothetical conserved protein	uncultured Acidobacteria bacterium	Acidobacteria
P22C4	ORF43	2e-114	AEP13700	0.497	0.699	hypothetical protein Cabther_B0702	Chloracidobacterium thermophilum B	Acidobacteria
P22C4	ORF44	1e-121	ACO32364	0.495	0.654	glycosyl transferase group 1 family	Acidobacterium capsulatum ATCC 51196	Acidobacteria
P22C4	ORF45	3e-21	AEU34825	0.353	0.547	hypothetical protein AciX8_0473	Granulicella mallensis MP5ACTX8	Acidobacteria
P22C4	ORF46	7e-25	AMZ74672	0.291	0.439	glycoside hydrolase	Pseudomonas fluorescens	Proteobacteria
P22C4	ORF47	2e-79	AEP12256	0.4	0.61	ABC-type transport system, involved in lipoprotein release, permease component	Chloracidobacterium thermophilum B	Acidobacteria
P22C4	ORF48	4e-06	ALS90939	0.249	0.444	zinc-ribbon domain protein	uncultured bacterium	Others
P22C4	ORF49	3e-100	BAT71855	0.716	0.812	carbamoyl-phosphate synthase large subunit	Thermosulfidibacter takaii ABI70S6	Aquificae
P22C4	ORF50	0	AEP12540	0.687	0.821	carbamoyl-phosphate synthase large subunit	Chloracidobacterium thermophilum B	Acidobacteria
P22C4	ORF51	6e-14	BAU14559	0.458	0.736	hypothetical protein LEP3755_51080	Leptolyngbya sp. NIES-3755	Cyanobacteria
P22C4	ORF52	1e-38	KEI66396	0.536	0.755	hypothetical protein A19Y_1328	Planktothrix agardhii NIVA-CYA 126/8	Cyanobacteria
P22C4	ORF53	2e-25	AFW94119	0.595	0.811	prevent-host-death protein-like protein	Anabaena sp. 90	Cyanobacteria
P22C4	ORF54	1e-20	AFY82259	0.4	0.608	hypothetical protein Oscil6304_2643	Oscillatoria acuminata PCC 6304	Cyanobacteria
P22C4	ORF55	3e-80	AEP13604	0.635	0.799	Dephospho-CoA kinase	Chloracidobacterium thermophilum B	Acidobacteria
P22C4	ORF56	0	AMY12863	0.576	0.698	putative DNA helicase	Acidobacteria bacterium DSM 100886	Acidobacteria
P22C4	ORF57	0	ABV27382	0.747	0.886	GTP-binding protein LepA	Chloracidobacterium thermophilum	Acidobacteria
P22C4	ORF58	7e-38	AEP12085	0.347	0.6	Mg-chelatase subunit ChlD	Chloracidobacterium thermophilum B	Acidobacteria
P22C4	ORF59	2e-78	BAL52794	0.523	0.717	glucose kinase	uncultured Acidobacteria bacterium	Acidobacteria
P22C4	ORF60	6e-19	ALU59662	0.306	0.516	hypothetical protein ACA40_07225	Pseudomonas syringae pv. lapsa	Proteobacteria
P22C4	ORF61	1e-40	ABF42370	0.541	0.72	serine/threonine protein kinase	Candidatus Koribacter versatilis Ellin345	Acidobacteria
P22C4	ORF62	7e-95	ANT49290	0.401	0.619	hypothetical protein A6B35_04735	Mesorhizobium amorphae CCNWGS0123	Proteobacteria
P22C4	ORF63	9e-166	AMY07777	0.386	0.568	Serine/threonine-protein kinase PrkC	Acidobacteria bacterium DSM 100886	Acidobacteria
P22C4	ORF64	1e-80	ACC83044	0.518	0.702	conserved hypothetical protein	Nostoc punctiforme PCC 73102	Cyanobacteria
P22C4	ORF65	5e-45	AFY44808	0.609	0.765	hypothetical protein Nos7107_4260	Nostoc sp. PCC 7107	Cyanobacteria
P22C4	ORF66	1e-67	AFZ18352	0.51	0.693	hypothetical protein Mic7113_2558	Microcoleus sp. PCC 7113	Cyanobacteria
P22C4	ORF67	2e-26	AMY08441	0.416	0.562	putative ester cyclase	Acidobacteria bacterium DSM 100886	Acidobacteria
P22C4	ORF68	No significant hit
P22C4	ORF69	6e-134	AFZ13085	0.475	0.662	GH3 auxin-responsive promoter	Crinalium epipsammum PCC 9333	Cyanobacteria
P22C4	ORF70	4e-68	EBZ70617	0.437	0.655	hypothetical protein GOS_4272163 partial	marine metagenome	Others
P22C4	ORF71	2e-54	AIQ29190	0.408	0.585	short-chain dehydrogenase	Paenibacillus sp. FSL P4-0081	Firmicutes
P22C4	ORF72	8e-69	CBW26631	0.478	0.659	conserved hypothetical protein	Halobacteriovorax marinus SJ	Proteobacteria
P22C4	ORF73	2e-156	CBW26632	0.621	0.77	putative Rieske iron-sulphur domain protein	Halobacteriovorax marinus SJ	Proteobacteria
P22C4	ORF74	No significant hit
P22C4	ORF75	7e-122	AEP11948	0.456	0.619	putative transcriptional regulator containing an HTH domain and an uncharacterized domain shared with the mammalian protein Schlafen	Chloracidobacterium thermophilum B	Acidobacteria
P22C4	ORF76	3e-14	AKX00385	0.4	0.667	Sequence 3752 from patent US 8962800		Others
P22C4	ORF77	No significant hit
P22C4	ORF78	6e-19	CUQ67993	0.539	0.684	conserved protein of unknown function	Candidatus Nitrospira inopinata	Nitrospira
P22C4	ORF79	8e-92	AMW98009	0.428	0.609	L-asparaginase	Rummeliibacillus stabekisii	Firmicutes
P22C4	ORF80	3e-123	AIA12218	0.468	0.682	Aminotransferase class-V	uncultured bacterium	Others
P22C4	ORF81	No significant hit
P22C4	ORF82	5e-125	AKV01644	0.81	0.9	Alkyl hydroperoxide reductase subunit C-like protein	Labilithrix luteola	Proteobacteria
P22C4	ORF83	1e-08	AIA30291	0.372	0.521	hypothetical protein Y981_04415	Leptospirillum ferriphilum YSK	Nitrospira
P22C4	ORF84	No significant hit
P22C4	ORF85	3e-11	AFN74578	0.302	0.477	alkyl hydroperoxide reductase	Melioribacter roseus P3M-2	Bacteroidetes
P22C4	ORF86	1e-95	BAL99303	0.451	0.643	peptidase M20 family protein	Caldilinea aerophila DSM 14535 = NBRC 104270	Chloroflexi
P22C4	ORF87	0	AHG93502	0.494	0.668	Protein of unknown function DUF4011 (plasmid)	Gemmatirosa kalamazoonesis	Gemmatimonadetes
P22C4	ORF88	4e-64	ABF42932	0.449	0.653	response regulator receiver modulated serine phosphatase	Candidatus Koribacter versatilis Ellin345	Acidobacteria
P22C4	ORF89	1e-51	AOE00534	0.444	0.586	Sequence 808 from patent US 9193962		Others
P22C4	ORF90	0	ALV86496	0.79	0.892	alcohol dehydrogenase GroES domain protein	uncultured bacterium 20	Others
P22C4	ORF91	2e-17	AHG93502	0.369	0.55	Protein of unknown function DUF4011 (plasmid)	Gemmatirosa kalamazoonesis	Gemmatimonadetes
P22C4	ORF92	9e-18	AHG93502	0.354	0.549	Protein of unknown function DUF4011 (plasmid)	Gemmatirosa kalamazoonesis	Gemmatimonadetes
P22C4	ORF93	No significant hit
P22C4	ORF94	No significant hit

## Sheet: P22E10
Contigs ID	ORFs ID	E-value	Accession_number	% identity	% similarity	description	Genus and species affiliation for top BLASTx hit (if known)	Phylum
P22E10	ORF1	3e-15	ACU92930	0.38	0.613	conserved hypothetical protein	Capnocytophaga ochracea DSM 7271	Bacteroidetes
P22E10	ORF2	No significant hit
P22E10	ORF3	1e-07	AFY01523	0.307	0.5	hypothetical protein Bdt_1834	Bdellovibrio bacteriovorus str. Tiberius	Proteobacteria
P22E10	ORF4	No significant hit
P22E10	ORF5	3e-97	ANM31716	0.67	0.738	single-stranded DNA-binding protein	Acidobacteria bacterium Mor1	Acidobacteria
P22E10	ORF6	1e-55	AGP38479	0.346	0.492	hypothetical protein SCE1572_30745	Sorangium cellulosum So0157-2	Proteobacteria
P22E10	ORF7	8e-49	AMV37440	0.468	0.634	Sulfotransferase domain protein	Planctomyces sp. SH-PL62	Planctomycetes
P22E10	ORF8	No significant hit
P22E10	ORF9	6e-82	EBG84144	0.525	0.674	hypothetical protein GOS_9364938	marine metagenome	Others
P22E10	ORF10	4e-30	AFN74656	0.389	0.539	alkyl hydroperoxide reductase/ Thiol specific antioxidant/ Mal allergen	Melioribacter roseus P3M-2	Ignavibacteriae
P22E10	ORF11	2e-19	ADG31717	0.355	0.589	alkyl hydroperoxide reductase/ Thiol specific antioxidant/ Mal allergen	Thiomonas intermedia K12	Proteobacteria
P22E10	ORF12	No significant hit
P22E10	ORF13	No significant hit
P22E10	ORF14	7e-132	GAK49354	0.644	0.796	ATPase associated with various cellular activities AAA_3	bacterium UASB14	Others
P22E10	ORF15	No significant hit
P22E10	ORF16	4e-123	GAK57268	0.583	0.755	hypothetical protein U27_04233	bacterium UASB270	Others
P22E10	ORF17	7e-19	ACY13160	0.413	0.595	hypothetical protein Hoch_0521	Haliangium ochraceum DSM 14365	Proteobacteria
P22E10	ORF18	3e-65	CAJ74195	0.432	0.618	conserved hypothetical protein	Candidatus Kuenenia stuttgartiensis	Planctomycetes
P22E10	ORF19	2e-35	ECU89222	0.326	0.54	hypothetical protein GOS_3000989 partial	marine metagenome	Others
P22E10	ORF20	No significant hit
P22E10	ORF21	No significant hit
P22E10	ORF22	1e-32	AMP52816	0.269	0.434	oxygen tolerance partial	uncultured bacterium	Others
P22E10	ORF23	2e-11	AHW60318	0.257	0.471	hypothetical protein FH5T_13655	Draconibacterium orientale	Bacteroidetes
P22E10	ORF24	8e-134	AJY71126	0.336	0.521	uridylyltransferase	Geobacter sulfurreducens	Proteobacteria
P22E10	ORF25	8e-87	ABK16679	0.45	0.642	protease Do	Syntrophobacter fumaroxidans MPOB	Proteobacteria
P22E10	ORF26	No significant hit
P22E10	ORF27	8e-56	EAQ41993	0.402	0.609	formate dehydrogenase subunit D	Polaribacter sp. MED152	Bacteroidetes
P22E10	ORF28	No significant hit
P22E10	ORF29	2e-05	ADL25106	0.28	0.429	putative lipoprotein	Fibrobacter succinogenes subsp. succinogenes S85	Fibrobacteres
P22E10	ORF30	2e-09	CCD01168	0.234	0.438	conserved protein of unknown function; mammalian cell entry related domain (plasmid)	Azospirillum brasilense Sp245	Proteobacteria
P22E10	ORF31	6e-103	GAK53284	0.576	0.77	ABC-type transport system	bacterium UASB14	Others
P22E10	ORF32	1e-78	GAK59649	0.523	0.714	hypothetical protein U27_06634	bacterium UASB270	Others
P22E10	ORF33	4e-20	EBG72509	0.465	0.636	hypothetical protein GOS_9384762	marine metagenome	Others
P22E10	ORF34	7e-14	ABK18132	0.333	0.547	putative anti-sigma regulatory factor serine/threonine protein kinase	Syntrophobacter fumaroxidans MPOB	Proteobacteria
P22E10	ORF35	2e-62	ADG67987	0.298	0.478	Stage II sporulation E family protein	Planctopirus limnophila DSM 3776	Planctomycetes
P22E10	ORF36	2e-20	ABQ89812	0.343	0.517	protein of unknown function DUF820	Roseiflexus sp. RS-1	Chloroflexi
P22E10	ORF37	3e-32	AGA28150	0.471	0.748	putative transcriptional regulator	Singulisphaera acidiphila DSM 18658	Planctomycetes
P22E10	ORF38	3e-76	AGA28151	0.271	0.42	antirepressor regulating drug resistance protein	Singulisphaera acidiphila DSM 18658	Planctomycetes
P22E10	ORF39	5e-21	EDJ33072	0.299	0.471	hypothetical protein GOS_1714515 partial	marine metagenome	Others
P22E10	ORF40	2e-86	ADH64342	0.457	0.599	conserved hypothetical protein	Meiothermus silvanus DSM 9946	Deinococcus-Thermus
P22E10	ORF41	1e-33	AEG62043	0.317	0.468	hypothetical protein Desru_3843	Desulfotomaculum ruminis DSM 2154	Firmicutes
P22E10	ORF42	2e-64	ABY95047	0.35	0.544	putative oxygen-independent coproporphyrinogen III oxidase	Thermoanaerobacter pseudethanolicus ATCC 33223	Firmicutes
P22E10	ORF43	7e-112	ANM30098	0.506	0.67	ferrochelatase	Acidobacteria bacterium Mor1	Acidobacteria
P22E10	ORF44	9e-19	ADK68091	0.598	0.72	SSU ribosomal protein S20P	Olsenella uli DSM 7084	Actinobacteria
P22E10	ORF45	No significant hit
P22E10	ORF46	2e-11	ANU20523	0.433	0.582	NrdH-redoxin	Planococcus plakortidis	Firmicutes
P22E10	ORF47	3e-61	AEE54654	0.439	0.568	Carboxylesterase type B (plasmid)	Haliscomenobacter hydrossis DSM 1100	Bacteroidetes
P22E10	ORF48	3e-74	GAQ25579	0.345	0.537	6-phospho-beta-glucosidase	Tepidanaerobacter syntrophicus	Firmicutes
P22E10	ORF49	No significant hit
P22E10	ORF50	No significant hit
P22E10	ORF51	6e-08	EEP71725	0.306	0.459	hypothetical protein MCAG_02052	Micromonospora sp. ATCC 39149	Actinobacteria
P22E10	ORF52	1e-15	ABF40604	0.46	0.61	Pilin, type IV, putative	Candidatus Koribacter versatilis Ellin345	Acidobacteria
P22E10	ORF53	9e-44	ALP51670	0.262	0.449	hypothetical protein Tel_00115	Candidatus Tenderia electrophaga	Proteobacteria
P22E10	ORF54	0.0001	AMJ65161	0.309	0.468	hypothetical protein AXW84_06770	Hymenobacter sp. PAMC 26628	Bacteroidetes
P22E10	ORF55	6e-05	CCK25165	0.248	0.367	Exoglucanase/xylanase	Streptomyces davawensis JCM 4913	Actinobacteria
P22E10	ORF56	3e-119	ACI20528	0.476	0.656	homoserine dehydrogenase (HDH): ThrA metL	Thermodesulfovibrio yellowstonii DSM 11347	Nitrospora
P22E10	ORF57	7e-144	ACI21560	0.659	0.793	threonine synthase	Thermodesulfovibrio yellowstonii DSM 11347	Nitrospora
P22E10	ORF58	2e-36	AEF83038	0.41	0.59	HAD-superfamily hydrolase, subfamily IA, variant 3	Treponema azotonutricium ZAS-9	Spirochaetes
P22E10	ORF59	4e-19	ACY19233	0.357	0.521	regulatory protein GntR HTH	Haliangium ochraceum DSM 14365	Proteobacteria
P22E10	ORF60	No significant hit
P22E10	ORF61	No significant hit
P22E10	ORF62	3e-20	BAL60048	0.315	0.546	hypothetical conserved protein	Candidatus Acetothermus autotrophicum	Acetothermia
P22E10	ORF63	5e-174	BAL58173	0.548	0.705	glucose-methanol-choline oxidoreductase	uncultured Acetothermia bacterium	Acetothermia
P22E10	ORF64	5e-43	EBO26626	0.49	0.702	hypothetical protein GOS_8109115 partial	marine metagenome	Others
P22E10	ORF65	2e-96	EDY86263	0.483	0.67	succinate-semialdehyde dehydrogenase	gamma proteobacterium HTCC5015	Proteobacteria
P22E10	ORF66	6e-141	BAH46556	0.519	0.684	conserved hypothetical protein	Brevibacillus brevis NBRC 100599	Firmicutes
P22E10	ORF67	No significant hit
P22E10	ORF68	No significant hit
P22E10	ORF69	No significant hit
P22E10	ORF70	8e-47	AKP49552	0.318	0.517	hypothetical protein CA2015_0067	Cyclobacterium amurskyense	Bacteroidetes
P22E10	ORF71	2e-15	ABC76070	0.328	0.493	zinc finger protein	Syntrophus aciditrophicus SB	Proteobacteria
P22E10	ORF72	5e-99	CUQ65237	0.491	0.668	Phosphate acyltransferase	Candidatus Nitrospira inopinata	Nitrospora
P22E10	ORF73	1e-55	AIQ74168	0.424	0.576	malonyl CoA-ACP transacylase	Paenibacillus odorifer	Firmicutes
P22E10	ORF74	No significant hit
P22E10	ORF75	2e-16	AEI47151	0.508	0.847	hypothetical protein Runsl_0709	Runella slithyformis DSM 19594	Bacteroidetes
P22E10	ORF76	No significant hit
P22E10	ORF77	No significant hit
P22E10	ORF78	3e-12	ADO73151	0.288	0.48	uncharacterized protein STAUR_5380	Stigmatella aurantiaca DW4/3-1	Proteobacteria
P22E10	ORF79	2e-70	ABB38706	0.307	0.471	hypothetical protein Dde_1909	Desulfovibrio alaskensis G20	Proteobacteria
P22E10	ORF80	0.0008	EDJ29917	0.647	0.676	hypothetical protein GOS_1720054 partial	marine metagenome	Others
P22E10	ORF81	2e-28	GAK48917	0.225	0.453	hypothetical protein U14_00128	bacterium UASB14	Others
P22E10	ORF82	5e-16	EFX61245	0.562	0.688	hypothetical protein DAPPUDRAFT_274329	Daphnia pulex	Others
P22E10	ORF83	2e-33	ANU40160	0.42	0.569	RNA polymerase subunit sigma	Flavonifractor plautii	Firmicutes
P22E10	ORF84	3e-66	ADB38883	0.414	0.63	pseudouridine synthase RluA family	Spirosoma linguale DSM 74	Bacteroidetes
P22E10	ORF85	1e-80	ADY57707	0.484	0.633	Xylose isomerase domain-containing protein TIM barrel	Rubinisphaera brasiliensis DSM 5305	Planctomycetes
P22E10	ORF86	8e-27	ACM21613	0.459	0.658	toxin PIN family	Geobacter daltonii FRC-32	Proteobacteria
P22E10	ORF87	1e-15	ACK80422	0.607	0.787	conserved hypothetical protein	Acidithiobacillus ferrooxidans ATCC 23270	Proteobacteria
P22E10	ORF88	0	ADB16428	0.77	0.862	glutamine synthetase catalytic region	Pirellula staleyi DSM 6068	Planctomycetes
P22E10	ORF89	1e-81	AND69253	0.562	0.751	ammonium transporter	Dyella thiooxydans	Proteobacteria
P22E10	ORF90	1e-38	BAN51227	0.593	0.716	ammonium transporter	Pseudomonas resinovorans NBRC 106553	Proteobacteria
P22E10	ORF91	5e-38	AMY69888	0.771	0.853	nitrogen regulatory protein P-II	Defluviimonas alba	Proteobacteria
P22E10	ORF92	1e-120	ADU73705	0.48	0.65	Protein of unknown function DUF3520	Ruminiclostridium thermocellum DSM 1313	Firmicutes
P22E10	ORF93	3e-94	AJC74157	0.627	0.789	dioxygenase	Pseudothermotoga hypogea DSM 11164 = NBRC 106472	Thermotogae
P22E10	ORF94	2e-110	AGA26003	0.543	0.699	hypothetical protein Sinac_1624	Singulisphaera acidiphila DSM 18658	Planctomycetes
P22E10	ORF95	2e-109	BAP57100	0.491	0.646	phosphoglycerate dehydrogenase-like oxidoreductase	Thioploca ingrica	Proteobacteria
P22E10	ORF96	0.0006	ECQ70974	0.344	0.578	hypothetical protein GOS_4579719 partial	marine metagenome	Others
P22E10	ORF97	0	ADB17152	0.702	0.822	phosphofructokinase	Pirellula staleyi DSM 6068	Planctomycetes
P22E10	ORF98	0.0005	EHQ89055	0.391	0.609	hypothetical protein DesyoDRAFT_1947	Desulfosporosinus youngiae DSM 17734	Firmicutes
P22E10	ORF99	0.001	CAO90141	0.594	0.719	unnamed protein product	Microcystis aeruginosa PCC 7806	Cyanobacteria
P22E10	ORF100	2e-24	AFZ20168	0.627	0.836	hypothetical protein Mic7113_4478	Microcoleus sp. PCC 7113	Cyanobacteria
P22E10	ORF101	0	AKJ63917	0.79	0.86	6-phosphogluconate dehydrogenase, NADP(+)-dependent, decarboxylating	Verrucomicrobia bacterium L21-Fru-AB	Verrucomicrobia
P22E10	ORF102	8e-14	EDC43564	0.294	0.551	hypothetical protein GOS_1476437	marine metagenome	Others
P22E10	ORF103	7e-18	BAU05193	0.341	0.597	cyclic nucleotide-binding protein	Fischerella sp. NIES-3754	Cyanobacteria
P22E10	ORF104	0	CAI50967	0.6	0.756	deoxyxylulose-5-phosphate synthase	uncultured bacterium	Others
P22E10	ORF105	6e-08	EDJ09506	0.742	0.871	hypothetical protein GOS_1755843 partial	marine metagenome	Others
P22E10	ORF106	2e-24	AKH39272	0.532	0.684	pilus assembly protein HicB	Nitrosomonas communis	Proteobacteria
P22E10	ORF107	3e-27	CDM90539	0.402	0.568	GCN5-related N-acetyltransferase	Xenorhabdus bovienii	Proteobacteria
P22E10	ORF108	No significant hit
P22E10	ORF109	1e-36	AFZ30698	0.454	0.59	Prostaglandin-endoperoxide synthase	Gloeocapsa sp. PCC 7428	Cyanobacteria
P22E10	ORF110	0	ACK42201	0.568	0.738	xylulokinase	Dictyoglomus turgidum DSM 6724	Dictyoglomi
P22E10	ORF111	2e-72	AMV17250	0.432	0.589	Alpha/beta hydrolase family protein	Planctomyces sp. SH-PL14	Planctomycetes
P22E10	ORF112	No significant hit
P22E10	ORF113	No significant hit
P22E10	ORF114	6e-18	ABK17098	0.378	0.575	PilT protein domain protein	Syntrophobacter fumaroxidans MPOB	Proteobacteria
P22E10	ORF115	3e-87	AFS78702	0.47	0.638	pseudouridine synthase RluA family	Clostridium acidurici 9a	Firmicutes
P22E10	ORF116	2e-17	AEA45510	0.25	0.451	hypothetical protein Fluta_3541	Fluviicola taffensis DSM 16823	Bacteroidetes
P22E10	ORF117	1e-39	ACU05270	0.477	0.705	2-amino-4-hydroxy-6-hydroxymethyldihydropteridine pyrophosphokinase	Pedobacter heparinus DSM 2366	Bacteroidetes
P22E10	ORF118	3e-103	AGB19871	0.541	0.763	3-methyl-2-oxobutanoate hydroxymethyltransferase	Thermoanaerobacterium thermosaccharolyticum M0795	Firmicutes
P22E10	ORF119	9e-98	ABN52135	0.513	0.7	pantoate/beta-alanine ligase	Ruminiclostridium thermocellum ATCC 27405	Firmicutes
P22E10	ORF120	9e-48	ADL25572	0.595	0.819	aspartate 1-decarboxylase	Fibrobacter succinogenes subsp. succinogenes S85	Fibrobacteres
P22E10	ORF121	No significant hit
P22E10	ORF122	No significant hit

## Sheet: 23K15
Contigs ID	ORFs ID	E-value	Accession_number	% identity	% similarity	description	Genus and species affiliation for top BLASTx hit (if known)	Phylum
23K15	ORF1	0.0002	EBG23486	0.48	0.74	hypothetical protein GOS_9467616 partial	marine metagenome	Others
23K15	ORF2	0.0006	ECM28347	0.393	0.639	hypothetical protein GOS_3527645 partial	marine metagenome	Others
23K15	ORF3	1e-21	ABE61211	0.273	0.45	hypothetical protein Nham_0315	Nitrobacter hamburgensis X14	Proteobacteria
23K15	ORF4	No significant hit
23K15	ORF5	No significant hit
23K15	ORF6	2e-06	ANS04578	0.463	0.672	membrane-anchored cell surface protein	uncultured Mediterranean phage	others
23K15	ORF7	2e-41	AKH48004	0.359	0.547	hypothetical protein	uncultured marine virus	Others
23K15	ORF8	1e-19	CCC91073	0.298	0.478	conserved hypothetical protein	Trypanosoma congolense IL3000	Others
23K15	ORF9	2e-05	AIW02689	0.296	0.592	hypothetical protein PBI_JAY2JAY_235	Streptomyces phage Jay2Jay	Others
23K15	ORF10	No significant hit
23K15	ORF11	No significant hit
23K15	ORF12	5e-52	AKH46381	0.348	0.55	hypothetical protein	uncultured marine virus	Others
23K15	ORF13	No significant hit
23K15	ORF14	No significant hit
23K15	ORF15	No significant hit
23K15	ORF16	No significant hit
23K15	ORF17	No significant hit
23K15	ORF18	No significant hit
23K15	ORF19	9e-23	AKH47999	0.235	0.472	hypothetical protein	uncultured marine virus	Others
23K15	ORF20	5e-120	EBQ71625	0.455	0.659	hypothetical protein GOS_7708885 partial	marine metagenome	Others
23K15	ORF21	No significant hit
23K15	ORF22	No significant hit
23K15	ORF23	No significant hit
23K15	ORF24	No significant hit
23K15	ORF25	No significant hit
23K15	ORF26	No significant hit
23K15	ORF27	No significant hit
23K15	ORF28	3e-24	ALQ10269	0.247	0.432	hypothetical protein D172_019560 (plasmid)	Pseudoalteromonas sp. Bsw20308	Proteobacteria
23K15	ORF29	No significant hit
23K15	ORF30	No significant hit
23K15	ORF31	No significant hit
23K15	ORF32	No significant hit
23K15	ORF33	No significant hit
23K15	ORF34	No significant hit
23K15	ORF35	7e-10	AEB71669	0.357	0.571	bacteriophage lambda NinG protein	Riemerella phage RAP44	Others
23K15	ORF36	No significant hit
23K15	ORF37	No significant hit
23K15	ORF38	No significant hit
23K15	ORF39	No significant hit
23K15	ORF40	No significant hit
23K15	ORF41	No significant hit
23K15	ORF42	No significant hit
23K15	ORF43	No significant hit
23K15	ORF44	No significant hit
23K15	ORF45	2e-27	EAQ42828	0.462	0.632	SpoU rRNA methylase family protein	Polaribacter sp. MED152	Bacteroidetes
23K15	ORF46	No significant hit
23K15	ORF47	No significant hit
23K15	ORF48	No significant hit
23K15	ORF49	No significant hit
23K15	ORF50	No significant hit
23K15	ORF51	No significant hit
23K15	ORF52	No significant hit
23K15	ORF53	No significant hit
23K15	ORF54	No significant hit
23K15	ORF55	4e-77	ABO92606	0.557	0.722	DNA methylase (plasmid)	Aeromonas salmonicida subsp. salmonicida A449	Proteobacteria
23K15	ORF56	5e-76	AKQ02446	0.359	0.573	hypothetical protein	uncultured Parcubacteria bacterium Rifle_16ft_4_minimus_37647	Others
23K15	ORF57	No significant hit
23K15	ORF58	2e-46	EBG38986	0.314	0.55	hypothetical protein GOS_9441244 partial	marine metagenome	Others
23K15	ORF59	No significant hit
23K15	ORF60	No significant hit
23K15	ORF61	1e-148	AEP12422	0.478	0.68	Aminopeptidase N	Chloracidobacterium thermophilum B	Acidobacteria
23K15	ORF62	No significant hit
23K15	ORF63	0	AIA17893	0.688	0.818	DNA repair protein RadA partial	uncultured bacterium	Others
23K15	ORF64	No significant hit
23K15	ORF65	5e-32	AHX15547	0.302	0.464	amidohydrolase	Dyella jiangningensis	Proteobacteria
23K15	ORF66	3e-105	AIA12218	0.487	0.677	Aminotransferase class-V	uncultured bacterium	Others
23K15	ORF67	2e-85	AMW98009	0.419	0.625	L-asparaginase	Rummeliibacillus stabekisii	Firmicutes
23K15	ORF68	7e-12	ADK68094	0.446	0.635	competence protein ComEA helix-hairpin-helix repeat protein	Olsenella uli DSM 7084	Actinobacteria
23K15	ORF69	No significant hit
23K15	ORF70	1e-06	EBG96726	0.537	0.704	hypothetical protein GOS_9343435 partial	marine metagenome	Others
23K15	ORF71	1e-08	GAP67179	0.373	0.483	hypothetical protein MBSD_n2495	Mizugakiibacter sediminis	Proteobacteria
23K15	ORF72	No significant hit
23K15	ORF73	No significant hit
23K15	ORF74	2e-25	AFZ27273	0.526	0.66	Protein of unknown function (DUF2958)	Cylindrospermum stagnale PCC 7417	Cyanobacteria
23K15	ORF75	No significant hit
23K15	ORF76	No significant hit
23K15	ORF77	3e-23	EBE19759	0.302	0.519	hypothetical protein GOS_9804121	marine metagenome	Others
23K15	ORF78	No significant hit
23K15	ORF79	2e-08	ACF43158	0.448	0.724	pentapeptide repeat protein	Pelodictyon phaeoclathratiforme BU-1	Chlorobi
23K15	ORF80	2e-16	BAB73602	0.28	0.486	alr1903	Nostoc sp. PCC 7120	Cyanobacteria
23K15	ORF81	9e-13	ABJ88156	0.293	0.503	hypothetical protein Acid_7245	Candidatus Solibacter usitatus Ellin6076	Acidobacteria
23K15	ORF82	No significant hit
23K15	ORF83	2e-32	ACA60612	0.39	0.6	RNA polymerase, sigma-24 subunit, ECF subfamily	Candidatus Desulforudis audaxviator MP104C	Firmicutes
23K15	ORF84	2e-102	AAC07389	0.388	0.592	transporter (extracellular solute binding protein family 5)	Aquifex aeolicus VF5	Aquificae
23K15	ORF85	2e-88	BAL52783	0.407	0.625	tetratricopeptide repeat domain protein	uncultured Acidobacteria bacterium	Acidobacteria
23K15	ORF86	5e-57	BAD41409	0.367	0.563	conserved hypothetical protein	Symbiobacterium thermophilum IAM 14863	Firmicutes
23K15	ORF87	No significant hit
23K15	ORF88	No significant hit
23K15	ORF89	8e-30	ADQ54416	0.327	0.491	methyltransferase	uncultured marine crenarchaeote E37-7F	Others
23K15	ORF90	0	AEP11082	0.761	0.889	inosine-5'-monophosphate dehydrogenase	Chloracidobacterium thermophilum B	Acidobacteria
23K15	ORF91	0	ABS24693	0.611	0.75	prolyl-tRNA synthetase	Anaeromyxobacter sp. Fw109-5	Proteobacteria
23K15	ORF92	4e-78	GAP16582	0.508	0.649	hypothetical protein LSAC_00438	Levilinea saccharolytica	Chloroflexi
23K15	ORF93	3e-55	ALF55770	0.459	0.644	hypothetical protein ACX27_27625	Nostoc piscinale CENA21	Cyanobacteria
23K15	ORF94	4e-147	CBX30011	0.402	0.633	Phosphoenolpyruvate-protein phosphotransferase	uncultured Desulfobacterium sp.	Proteobacteria
23K15	ORF95	7e-22	AMP94520	0.539	0.708	phosphocarrier protein HPr	Legionella pneumophila subsp. pascullei	Proteobacteria
23K15	ORF96	4e-108	BAU79801	0.522	0.735	putative dipeptide transporter permease DppC	uncultured Aquificaceae bacterium	Aquificae
23K15	ORF97	5e-72	ADQ14413	0.457	0.671	binding-protein-dependent transport systems inner membrane component	Halanaerobium hydrogeniformans	Firmicutes
23K15	ORF98	2e-72	AHG88948	0.397	0.528	amine oxidase	Gemmatirosa kalamazoonesis	Gemmatimonadetes
23K15	ORF99	No significant hit
23K15	ORF100	1e-145	AEP12554	0.599	0.782	Exopolyphosphatase-related protein	Chloracidobacterium thermophilum B	Acidobacteria
23K15	ORF101	No significant hit
23K15	ORF102	2e-12	ACC73796	0.336	0.511	histidine kinase	Paraburkholderia phymatum STM815	Proteobacteria
23K15	ORF103	8e-155	ACR12452	0.599	0.739	putative beta-lactamase	Teredinibacter turnerae T7901	Proteobacteria
23K15	ORF104	4e-46	BAN09779	0.487	0.737	probable AsnC-type transcription regulator	Mesorhizobium loti NZP2037	Proteobacteria
23K15	ORF105	No significant hit
23K15	ORF106	2e-06	AKF10722	0.301	0.459	hypothetical protein DB32_007871	Sandaracinus amylolyticus	Proteobacteria
23K15	ORF107	4e-83	AJD30987	0.468	0.719	glycosyltransferase WecB/TagA/CpsF family protein	Clostridium botulinum Prevot_594	Firmicutes
23K15	ORF108	1e-125	ACH40443	0.583	0.74	undecaprenyl-phosphate glycosyltransferase DPM1-like family	Geobacter bemidjiensis Bem	Proteobacteria
23K15	ORF109	7e-114	CCT67725	0.584	0.741	related to dTDP-glucose 4 6-dehydratase	Fusarium fujikuroi IMI 58289	Others
23K15	ORF110	8e-64	ACF15163	0.384	0.576	Methyltransferase type 11	Chloroherpeton thalassium ATCC 35110	Chlorobi
23K15	ORF111	8e-121	ANM29719	0.416	0.6	hypothetical protein ABI59_09225	Acidobacteria bacterium Mor1	Acidobacteria
23K15	ORF112	5e-10	ACD82251	0.413	0.565	Conserved hypothetical protein	Methylacidiphilum infernorum V4	Verrucomicrobia
23K15	ORF113	2e-07	EGB06630	0.379	0.516	hypothetical protein AURANDRAFT_65510	Aureococcus anophagefferens	Others
23K15	ORF114	2e-15	AFE07090	0.301	0.555	hypothetical protein COCOR_06720	Corallococcus coralloides DSM 2259	Proteobacteria
23K15	ORF115	2e-29	BAP57574	0.496	0.652	hypothetical protein THII_3277	Thioploca ingrica	Proteobacteria
23K15	ORF116	9e-166	BAP57293	0.487	0.646	WD repeat-containing protein	Thioploca ingrica	Proteobacteria
23K15	ORF117	9e-176	AMV16752	0.451	0.632	Asparagine synthetase 1	Planctomyces sp. SH-PL14	Planctomycetes
23K15	ORF118	0	AGA33402	0.664	0.801	hypothetical protein TVNIR_1740	Thioalkalivibrio nitratireducens DSM 14787	Proteobacteria
23K15	ORF119	7e-91	EBG36946	0.468	0.704	hypothetical protein GOS_9444603	marine metagenome	Others
23K15	ORF120	No significant hit
23K15	ORF121	3e-12	ANM32168	0.258	0.492	hypothetical protein ABI59_09255	Acidobacteria bacterium Mor1	Acidobacteria
23K15	ORF122	No significant hit
23K15	ORF123	3e-83	ALA26476	0.633	0.809	transposase	Piscirickettsia salmonis	Proteobacteria
23K15	ORF124	7e-11	AFY61701	0.528	0.681	putative low-complexity protein	Synechococcus sp. PCC 6312	Cyanobacteria
23K15	ORF125	6e-08	ACT33653	0.313	0.443	conserved hypothetical protein (plasmid)	Clostridium botulinum D str. 1873	Firmicutes
23K15	ORF126	1e-06	CUS04589	0.342	0.474	protein of unknown function	Ardenticatena	Chloroflexi
23K15	ORF127	1e-25	AGH44066	0.636	0.766	mini-circle transposase for IS117	Paraglaciecola psychrophila 170	Proteobacteria
23K15	ORF128	4e-13	BAO45774	0.558	0.731	conserved hypothetical protein (plasmid)	Thiolapillus brandeum	Proteobacteria
23K15	ORF129	9e-58	BAO45622	0.58	0.71	transposase IS116/IS110/IS902 family	Thiolapillus brandeum	Proteobacteria
23K15	ORF130	No significant hit
23K15	ORF131	8e-49	SCG40406	0.365	0.552	cation:H+ antiporter	Micromonospora inositola	Actinobacteria
23K15	ORF132	5e-17	ACB07532	0.396	0.544	UspA domain protein	Candidatus Korarchaeum cryptofilum OPF8	Others
23K15	ORF133	No significant hit
23K15	ORF134	2e-103	AEP11933	0.61	0.75	putative 4-hydroxybenzoate polyprenyltransferase	Chloracidobacterium thermophilum B	Acidobacteria
23K15	ORF135	5e-61	AEP12460	0.533	0.724	polyprenyl P-hydroxybenzoate-like phenylacrylic acid decarboxylase	Chloracidobacterium thermophilum B	Acidobacteria
23K15	ORF136	3e-20	BAP55714	0.26	0.477	hypothetical protein THII_1417	Thioploca ingrica	Proteobacteria
23K15	ORF137	3e-08	ABD40260	0.397	0.545	APHP	Methanospirillum hungatei JF-1	Others
23K15	ORF138	6e-71	ABJ85349	0.654	0.748	Rieske (2Fe-2S) domain protein	Candidatus Solibacter usitatus Ellin6076	Acidobacteria
23K15	ORF139	6e-41	ADA68799	0.6	0.744	HET-E partial	Podospora anserina	Others
23K15	ORF140	0.0001	BAP56394	0.528	0.722	hypothetical protein THII_2097	Thioploca ingrica	Proteobacteria
23K15	ORF141	2e-12	AIA12218	0.571	0.8	Aminotransferase class-V	uncultured bacterium	Others
23K15	ORF142	No significant hit
23K15	ORF143	9e-30	ACD66931	0.611	0.8	undecaprenol kinase	Sulfurihydrogenibium sp. YO3AOP1	Aquificae
23K15	ORF144	2e-26	CDU33995	1	1	Putative cytochrome oxidase subunit	Escherichia coli D6-113.11	Proteobacteria
23K15	ORF145	No significant hit
23K15	ORF146	4e-15	CBA32403	0.643	0.696	Bifunctional protein putA	Curvibacter putative symbiont of Hydra magnipapillata	Proteobacteria
23K15	ORF147	8e-18	CBA27511	0.632	0.772	hypothetical protein Csp_A02640	Curvibacter putative symbiont of Hydra magnipapillata	Proteobacteria
23K15	ORF148	7e-10	BAO76928	0.632	0.842	putative nucleoside-diphosphate-sugar epimerase	Winogradskyella sp. PG-2	Bacteroidetes
23K15	ORF149	2e-22	AHY66056	0.979	0.979	Chloride channel protein	Escherichia coli O145:H28 str. RM12761	Proteobacteria
23K15	ORF150	3e-23	AEV73404	0.582	0.736	hypothetical protein MycrhN_2836	Mycobacterium rhodesiae NBB3	Actinobacteria
23K15	ORF151	No significant hit
23K15	ORF152	4e-44	EBF67083	0.763	0.93	hypothetical protein GOS_9559738 partial	marine metagenome	Others
23K15	ORF153	7e-31	AJQ29146	0.481	0.717	nucleotide sugar dehydrogenase	Pelosinus fermentans JBW45	Firmicutes
23K15	ORF154	7e-38	EBG78031	0.684	0.842	hypothetical protein GOS_9375338	marine metagenome	Others
23K15	ORF155	3e-31	AMO24042	0.737	0.789	amidophosphoribosyltransferase	Ramlibacter tataouinensis	Proteobacteria
23K15	ORF156	2e-16	CBL43781	0.36	0.493	transposase	gamma proteobacterium HdN1	Proteobacteria
23K15	ORF157	No significant hit
23K15	ORF158	2e-09	ALN79515	0.429	0.592	hypothetical protein LA76x_1358	Lysobacter antibioticus	Proteobacteria
23K15	ORF159	2e-54	BAK74850	0.846	0.913	chromosomal replication initiator protein DnaA	Pseudogulbenkiania sp. NH8B	Proteobacteria
23K15	ORF160	No significant hit
23K15	ORF161	2e-46	AEB72598	0.558	0.741	heavy metal translocating P-type ATPase	Lactobacillus buchneri NRRL B-30929	Firmicutes
23K15	ORF162	6e-11	AGP37403	0.416	0.573	hypothetical protein SCE1572_24685	Sorangium cellulosum So0157-2	Proteobacteria
23K15	ORF163	No significant hit
23K15	ORF164	1e-40	ANT50549	0.873	0.949	acetoin utilization protein	Mesorhizobium amorphae CCNWGS0123	Proteobacteria
23K15	ORF165	5e-27	ANN61783	0.852	0.902	exodeoxyribonuclease VII small subunit	Mesorhizobium loti NZP2037	Proteobacteria
23K15	ORF166	7e-36	ALM09275	0.467	0.708	phosphate transporter	Sediminicola sp. YIK13	Bacteroidetes
23K15	ORF167	No significant hit
23K15	ORF168	No significant hit
23K15	ORF169	No significant hit
23K15	ORF170	7e-33	BAN35337	0.561	0.719	hypothetical protein SCD_n01515	Sulfuricella denitrificans skB26	Proteobacteria
23K15	ORF171	4e-18	ALK88640	0.73	0.841	ComEC family competence protein	Limnohabitans sp. 63ED37-2	Proteobacteria
23K15	ORF172	5e-20	SCK49795	0.671	0.786	competence protein ComEC	Variovorax sp. HW608	Proteobacteria
23K15	ORF173	2e-40	AMN40743	0.761	0.694	non-ribosomal peptide synthetase	Rhodoplanes sp. Z2-YC6860	Proteobacteria
23K15	ORF174	7e-07	ALM13813	0.816	0.632	large subunit ribosomal protein L4	Candidatus Peribacter riflensis	Candidatus Peregrinibacteria
23K15	ORF175	2e-15	EBO30152	0.711	0.526	hypothetical protein GOS_8103163	marine metagenome	Others
23K15	ORF176	No significant hit
23K15	ORF177	No significant hit
23K15	ORF178	No significant hit
23K15	ORF179	1e-75	AFC42031	0.888	0.79	putative acyl-CoA dehydrogenase	Mycobacterium intracellulare ATCC 13950	Actinobacteria
23K15	ORF180	1e-59	GAP07043	0.859	0.655	DnaQ family exonuclease	Anaerolinea thermolimosa	Chloroflexi
23K15	ORF181	5e-09	AEI95260	0.732	0.805	signal transduction histidine kinase	Roseobacter litoralis Och 149	Proteobacteria
23K15	ORF182	7e-24	AER92069	0.906	0.969	hypothetical protein i14_4636	Escherichia coli str. 'clone D i14'	Proteobacteria

## Sheet: P27K16
Contigs ID	ORFs ID	E-value	Accession_number	% identity	% similarity	description	Genus and species affiliation for top BLASTx hit (if known)	Phylum
P27K16	ORF1	7e-15	AEB67160	0.54	0.651	glyoxalase family protein	Methanosaeta concilii GP6	Others
P27K16	ORF2	1e-44	BAB51858	0.629	0.767	mll5401	Mesorhizobium loti MAFF303099	Proteobacteria
P27K16	ORF3	3e-67	ALI00589	0.776	0.888	dehydrogenase	Pseudomonas fluorescens	Proteobacteria
P27K16	ORF4	3e-55	ACC80736	0.596	0.743	3-demethylubiquinone-9 3-methyltransferase	Nostoc punctiforme PCC 73102	Cyanobacteria
P27K16	ORF5	3e-27	ADG88499	0.475	0.628	protein of unknown function DUF6 transmembrane	Thermobispora bispora DSM 43833	Actinobacteria
P27K16	ORF6	3e-34	ABC80782	0.596	0.777	DGPFAETKE domain-containing protein	Anaeromyxobacter dehalogenans 2CP-C	Proteobacteria
P27K16	ORF7	9e-35	CAN96584	0.762	0.917	RNA polymerase sigma-70 factor ECF subfamily	Sorangium cellulosum So ce56	Proteobacteria
P27K16	ORF8	3e-134	AKJ06880	0.82	0.887	RNA polymerase sigma-70 factor ECF subfamily	Archangium gephyra	Proteobacteria
P27K16	ORF9	0	AMY07901	0.732	0.857	Putative DNA ligase-like protein	Acidobacteria bacterium DSM 100886	Acidobacteria
P27K16	ORF10	7e-175	AMO23572	0.715	0.816	ATP-dependent DNA ligase	Ramlibacter tataouinensis	Proteobacteria
P27K16	ORF11	2e-104	AMO22454	0.705	0.791	5'-3' exonuclease	Ramlibacter tataouinensis	Proteobacteria
P27K16	ORF12	0	AHG89198	0.644	0.788	MATE efflux family protein	Gemmatirosa kalamazoonesis	Gemmatimonadetes
P27K16	ORF13	0	AHG91656	0.743	0.855	MATE efflux family protein	Gemmatirosa kalamazoonesis	Gemmatimonadetes
P27K16	ORF14	2e-60	ABC82014	0.711	0.844	DoxX	Anaeromyxobacter dehalogenans 2CP-C	Proteobacteria
P27K16	ORF15	6e-114	AIA18803	0.648	0.778	MFSAntibioticEffluxPump	uncultured bacterium	Others
P27K16	ORF16	4e-27	ALF52517	0.424	0.618	hypothetical protein ACX27_06125	Nostoc piscinale CENA21	Cyanobacteria
P27K16	ORF17	0	AHG92424	0.587	0.72	peptidase M24 (plasmid)	Gemmatirosa kalamazoonesis	Gemmatimonadetes
P27K16	ORF18	4e-50	BAH37501	0.669	0.818	MarR family transcriptional regulator	Gemmatimonas aurantiaca T-27	Gemmatimonadetes
P27K16	ORF19	6e-50	AHG92663	0.728	0.838	DoxX family protein (plasmid)	Gemmatirosa kalamazoonesis	Gemmatimonadetes
P27K16	ORF20	No significant hit
P27K16	ORF21	No significant hit
P27K16	ORF22	5e-117	AFZ12491	0.61	0.791	2-hydroxy-3-oxopropionate reductase	Crinalium epipsammum PCC 9333	Cyanobacteria
P27K16	ORF23	2e-44	AHG88624	0.533	0.711	hypothetical protein J421_1087	Gemmatirosa kalamazoonesis	Gemmatimonadetes
P27K16	ORF24	7e-15	ACZ41525	0.479	0.648	hypothetical protein Tter_0607	Thermobaculum terrenum ATCC BAA-798	Chloroflexi
P27K16	ORF25	1e-60	ACZ40792	0.415	0.588	formate dehydrogenase accessory protein	Sphaerobacter thermophilus DSM 20745	Chloroflexi
P27K16	ORF26	1e-48	ACZ40790	0.514	0.674	Polysulphide reductase NrfD	Sphaerobacter thermophilus DSM 20745	Chloroflexi
P27K16	ORF27	2e-131	ACZ40789	0.73	0.84	4Fe-4S ferredoxin iron-sulfur binding domain protein	Sphaerobacter thermophilus DSM 20745	Chloroflexi
P27K16	ORF28	0	ACZ41530	0.638	0.77	formate dehydrogenase alpha subunit	Thermobaculum terrenum ATCC BAA-798	Chloroflexi
P27K16	ORF29	3e-77	ACM06438	0.703	0.845	formate dehydrogenase-O major subunit (plasmid)	Thermomicrobium roseum DSM 5159	Chloroflexi
P27K16	ORF30	1e-156	AKI98604	0.579	0.715	Phytoene dehydrogenase	Archangium gephyra	Proteobacteria
P27K16	ORF31	No significant hit
P27K16	ORF32	5e-28	AMW04498	0.314	0.488	hypothetical protein GEMMAAP_05865	Gemmatimonas phototrophica	Gemmatimonadetes
P27K16	ORF33	2e-36	AHG89448	0.881	0.94	Cold-shock protein DNA-binding protein	Gemmatirosa kalamazoonesis	Gemmatimonadetes
P27K16	ORF34	8e-19	AJK79458	0.406	0.601	membrane protein	Mycobacterium avium subsp. paratuberculosis	Actinobacteria
P27K16	ORF35	0	CBE68309	0.47	0.654	conserved membrane protein of unknown function	Candidatus Methylomirabilis oxyfera	candidate division NC10
P27K16	ORF36	5e-07	BAI69831	0.4	0.587	hypothetical protein HTH_1380	Hydrogenobacter thermophilus TK-6	Aquificae
P27K16	ORF37	No significant hit
P27K16	ORF38	6e-19	AIA11899	0.382	0.542	NUDIX domain protein	uncultured bacterium	Others
P27K16	ORF39	No significant hit
P27K16	ORF40	No significant hit
P27K16	ORF41	0	ABJ81884	0.448	0.592	glycosyltransferase 36	Candidatus Solibacter usitatus Ellin6076	Acidobacteria
P27K16	ORF42	7e-77	ACT16334	0.655	0.762	peptide methionine sulfoxide reductase	Geobacter sp. M21	Cyanobacteria
P27K16	ORF43	1e-76	ABU59108	0.762	0.853	methionine-R-sulfoxide reductase	Roseiflexus castenholzii DSM 13941	Chloroflexi
P27K16	ORF44	3e-22	CBE67468	0.5	0.707	protein of unknown function	Candidatus Methylomirabilis oxyfera	candidate division NC10
P27K16	ORF45	4e-116	ABJ85946	0.585	0.787	transcriptional regulator XRE family	Candidatus Solibacter usitatus Ellin6076	Acidobacteria
P27K16	ORF46	No significant hit
P27K16	ORF47	No significant hit
P27K16	ORF48	No significant hit
P27K16	ORF49	7e-47	ACV35456	0.57	0.732	conserved hypothetical protein	Candidatus Accumulibacter phosphatis clade IIA str. UW-1	Proteobacteria
P27K16	ORF50	No significant hit
P27K16	ORF51	2e-56	AHG93685	0.586	0.701	hypothetical protein J421_6150 (plasmid)	Gemmatirosa kalamazoonesis	Gemmatimonadetes
P27K16	ORF52	2e-10	ANP72336	0.362	0.512	hypothetical protein PA27867_1379	Cryobacterium arcticum	Actinobacteria
P27K16	ORF53	1e-21	AHG90111	0.309	0.45	hypothetical protein J421_2574	Gemmatirosa kalamazoonesis	Gemmatimonadetes
P27K16	ORF54	5e-110	EIP96734	0.545	0.717	metal-dependent hydrolase beta-lactamase superfamily II	Opitutaceae bacterium TAV1	Verrucomicrobia
P27K16	ORF55	3e-18	AJF62526	0.506	0.658	Blue (Type 1) copper protein	archaeon GW2011_AR20	Others
P27K16	ORF56	8e-43	AHG89356	0.423	0.626	blue (type 1) copper domain protein	Gemmatirosa kalamazoonesis	Gemmatimonadetes
P27K16	ORF57	5e-51	AGA27998	0.419	0.585	DNA-binding domain-containing protein AraC-type	Singulisphaera acidiphila DSM 18658	Planctomycetes
P27K16	ORF58	1e-09	ACH37369	0.331	0.455	CHRD domain protein	Geobacter bemidjiensis Bem	Cyanobacteria
P27K16	ORF59	6e-146	AHG88005	0.424	0.548	protein kinase	Gemmatirosa kalamazoonesis	Gemmatimonadetes
P27K16	ORF60	No significant hit
P27K16	ORF61	No significant hit
P27K16	ORF62	No significant hit
P27K16	ORF63	2e-06	CCB69331	0.279	0.529	Protein of unknown function	Flavobacterium branchiophilum FL-15	Bacteroidetes
P27K16	ORF64	2e-18	BAN00758	0.372	0.5	hypothetical protein YM304_04440	Ilumatobacter coccineus YM16-304	Actinobacteria
P27K16	ORF65	7e-31	BAC89744	0.285	0.444	glr1803	Gloeobacter violaceus PCC 7421	Cyanobacteria
P27K16	ORF66	1e-52	AHG89267	0.645	0.787	RNA polymerase sigma factor	Gemmatirosa kalamazoonesis	Gemmatimonadetes
P27K16	ORF67	5e-132	AHG92487	0.65	0.752	protein kinase (plasmid)	Gemmatirosa kalamazoonesis	Gemmatimonadetes
P27K16	ORF68	4e-160	AHG89363	0.606	0.724	Di-heme cytochrome c peroxidase	Gemmatirosa kalamazoonesis	Gemmatimonadetes
P27K16	ORF69	No significant hit
P27K16	ORF70	6e-89	ADY22385	0.32	0.507	short chain dehydrogenase	Bacillus thuringiensis serovar finitimus YBT-020	Firmicutes
P27K16	ORF71	3e-27	AFN75917	0.489	0.767	excinuclease ABC subunit C	Melioribacter roseus P3M-2	Ignavibacteriae
P27K16	ORF72	1e-71	BAC92183	0.366	0.549	gll4242	Gloeobacter violaceus PCC 7421	Cyanobacteria
P27K16	ORF73	No significant hit
P27K16	ORF74	4e-88	AMW05783	0.493	0.702	hypothetical protein GEMMAAP_15245	Gemmatimonas phototrophica	Gemmatimonadetes
P27K16	ORF75	1e-151	AHG90287	0.45	0.57	multicopper oxidase type 3	Gemmatirosa kalamazoonesis	Gemmatimonadetes
P27K16	ORF76	5e-16	ABE62973	0.709	0.836	conserved hypothetical protein	Nitrobacter hamburgensis X14	Proteobacteria
P27K16	ORF77	1e-64	AFQ19605	0.306	0.479	hypothetical protein BTG_31343 (plasmid)	Bacillus thuringiensis HD-771	Firmicutes
P27K16	ORF78	No significant hit
P27K16	ORF79	3e-11	AJA61921	0.522	0.612	hypothetical protein RN69_17400	Bradyrhizobium japonicum	Proteobacteria
P27K16	ORF80	4e-36	ADG20853	0.292	0.456	hypothetical protein BC1002_7103 (plasmid)	Burkholderia sp. CCGE1002	Proteobacteria
P27K16	ORF81	4e-42	ADG20852	0.269	0.441	hypothetical protein BC1002_7102 (plasmid)	Burkholderia sp. CCGE1002	Proteobacteria
P27K16	ORF82	No significant hit
P27K16	ORF83	No significant hit
P27K16	ORF84	2e-101	EJF51798	0.366	0.514	Rhs family protein	Saprospira grandis DSM 2844	Bacteroidetes

## Sheet: P27M10
Contigs ID	ORFs ID	E-value	Accession_number	% identity	% similarity	description	Genus and species affiliation for top BLASTx hit (if known)	Phylum
P27M10	ORF1	0	ABF39672	0.617	0.743	AMP-dependent synthetase and ligase	Candidatus Koribacter versatilis Ellin345	Acidobacteria
P27M10	ORF2	2e-10	ABJ85765	0.406	0.656	glutaredoxin 2	Candidatus Solibacter usitatus Ellin6076	Acidobacteria
P27M10	ORF3	4e-95	AGA29986	0.483	0.663	gluconolactonase	Singulisphaera acidiphila DSM 18658	Planctomycetes
P27M10	ORF4	2e-159	AHY49696	0.464	0.616	polyvinyl-alcohol dehydrogenase	Bradyrhizobium japonicum SEMIA 5079	Proteobacteria
P27M10	ORF5	No significant hit
P27M10	ORF6	No significant hit
P27M10	ORF7	No significant hit
P27M10	ORF8	2e-27	ANY84104	0.372	0.598	DNA-binding response regulator (plasmid)	Microvirga sp. V5/3M	Proteobacteria
P27M10	ORF9	9e-115	AIE86086	0.637	0.742	Dienelactone hydrolase-related enzyme	Fimbriimonas ginsengisoli Gsoil 348	Armatimonadetes
P27M10	ORF10	0	ABU59007	0.593	0.721	Ig family protein	Roseiflexus castenholzii DSM 13941	Chloroflexi
P27M10	ORF11	3e-87	SBT42725	0.416	0.593	hypothetical protein GA0070621_1593	Micromonospora narathiwatensis	Actinobacteria
P27M10	ORF12	0	ABF40928	0.52	0.71	hypothetical protein Acid345_1927	Candidatus Koribacter versatilis Ellin345	Acidobacteria
P27M10	ORF13	1e-37	AEU37336	0.542	0.763	hypothetical protein AciX8_3033	Granulicella mallensis MP5ACTX8	Acidobacteria
P27M10	ORF14	3e-26	AMV27003	0.635	0.781	Transcriptional repressor SdpR	Gemmata sp. SH-PL17	Planctomycetes
P27M10	ORF15	1e-44	AGA28978	0.534	0.702	Activator of Hsp90 ATPase 1-like protein	Singulisphaera acidiphila DSM 18658	Planctomycetes
P27M10	ORF16	No significant hit
P27M10	ORF17	7e-102	AMN39653	0.6	0.756	hypothetical protein RHPLAN_11920	Rhodoplanes sp. Z2-YC6860	Proteobacteria
P27M10	ORF18	5e-24	AFL90044	0.469	0.694	putative endonuclease containing a URI domain	Terriglobus roseus DSM 18391	Acidobacteria
P27M10	ORF19	4e-98	ABF39969	0.559	0.69	Phenazine biosynthesis PhzC/PhzF protein	Candidatus Koribacter versatilis Ellin345	Acidobacteria
P27M10	ORF20	0	ABF40100	0.839	0.92	chaperonin GroEL	Candidatus Koribacter versatilis Ellin345	Acidobacteria
P27M10	ORF21	5e-47	AEU36202	0.8	0.926	Chaperonin Cpn10	Granulicella mallensis MP5ACTX8	Acidobacteria
P27M10	ORF22	4e-33	ABF40106	0.466	0.695	hypothetical protein Acid345_1103	Candidatus Koribacter versatilis Ellin345	Acidobacteria
P27M10	ORF23	2e-48	ABF42599	0.648	0.792	conserved hypothetical protein	Candidatus Koribacter versatilis Ellin345	Acidobacteria
P27M10	ORF24	1e-109	AHG93156	0.581	0.735	Xylose isomerase domain-containing protein TIM barrel (plasmid)	Gemmatirosa kalamazoonesis	Gemmatimonadetes
P27M10	ORF25	4e-115	AFY77262	0.582	0.727	transglutaminase-like enzyme predicted cysteine protease	Pleurocapsa sp. PCC 7327	Cyanobacteria
P27M10	ORF26	6e-124	AMY08839	0.77	0.88	proteasome endopeptidase complex, archaeal, beta subunit	Acidobacteria bacterium DSM 100886	Acidobacteria
P27M10	ORF27	2e-21	ALN90541	0.46	0.653	diguanylate cyclase domain protein	Lysobacter gummosus	Proteobacteria
P27M10	ORF28	1e-32	ABF40682	0.679	0.833	hypothetical protein Acid345_1681	Candidatus Koribacter versatilis Ellin345	Acidobacteria
P27M10	ORF29	1e-40	ABF40681	0.735	0.88	hypothetical protein Acid345_1680	Candidatus Koribacter versatilis Ellin345	Acidobacteria
P27M10	ORF30	4e-52	AMV19282	0.506	0.675	Carboxymuconolactone decarboxylase family protein	Planctomyces sp. SH-PL14	Planctomycetes
P27M10	ORF31	4e-55	ABF40680	0.55	0.73	amino acid/polyamine/organocation transporter APC superfamily	Candidatus Koribacter versatilis Ellin345	Acidobacteria
P27M10	ORF32	3e-46	ABF40680	0.582	0.727	amino acid/polyamine/organocation transporter APC superfamily	Candidatus Koribacter versatilis Ellin345	Acidobacteria
P27M10	ORF33	0	ACO34498	0.691	0.805	conserved domain protein	Acidobacterium capsulatum ATCC 51196	Acidobacteria
P27M10	ORF34	2e-31	ABF40677	0.582	0.704	hypothetical protein Acid345_1676	Candidatus Koribacter versatilis Ellin345	Acidobacteria
P27M10	ORF35	2e-38	ABF40676	0.67	0.88	deiodinase, iodothyronine, type I	Candidatus Koribacter versatilis Ellin345	Acidobacteria
P27M10	ORF36	2e-44	AFZ08062	0.602	0.72	protein of unknown function DUF1486	Oscillatoria nigro-viridis PCC 7112	Cyanobacteria
P27M10	ORF37	2e-33	ALN81363	0.488	0.603	glyoxalase/Bleomycin resistance /Dioxygenase superfamily protein	Lysobacter antibioticus	Proteobacteria
P27M10	ORF38	4e-27	AMK77087	0.481	0.643	hypothetical protein JT25_011430	Methylomonas denitrificans	Proteobacteria
P27M10	ORF39	8e-152	ABI06432	0.813	0.897	Sequence 22 from patent US 7078504		Others
P27M10	ORF40	0	ACO33044	0.781	0.895	BNR/Asp-box repeat protein	Acidobacterium capsulatum ATCC 51196	Acidobacteria
P27M10	ORF41	1e-73	AGU51651	0.589	0.731	polyketide cyclase/dehydrase family protein	Variovorax paradoxus B4	Proteobacteria
P27M10	ORF42	9e-53	CAN99134	0.642	0.761	hypothetical protein sce8962	Sorangium cellulosum So ce56	Proteobacteria
P27M10	ORF43	7e-71	CCB63367	0.42	0.59	putative cyclase/dehydrase	Hyphomicrobium sp. MC1	Proteobacteria
P27M10	ORF44	5e-156	EFL23320	0.619	0.754	beta-lactamase	Streptomyces himastatinicus ATCC 53653	Actinobacteria
P27M10	ORF45	7e-07	AMV36615	0.451	0.706	hypothetical protein VT85_04225	Planctomyces sp. SH-PL62	Planctomycetes
P27M10	ORF46	No significant hit
P27M10	ORF47	1e-59	ABJ86247	0.635	0.774	Glyoxalase/bleomycin resistance protein/dioxygenase	Candidatus Solibacter usitatus Ellin6076	Acidobacteria
P27M10	ORF48	1e-41	EHR72039	0.524	0.762	putative transcriptional regulator	Burkholderiales bacterium JOSHI_001	Proteobacteria
P27M10	ORF49	3e-163	ADV84393	0.538	0.703	aminotransferase class V	Terriglobus saanensis SP1PR4	Acidobacteria
P27M10	ORF50	4e-27	ABF42217	0.335	0.533	hypothetical protein Acid345_3216	Candidatus Koribacter versatilis Ellin345	Acidobacteria
P27M10	ORF51	2e-96	CAI07858	0.872	0.904	conserved hypothetical protein	Aromatoleum aromaticum EbN1	Proteobacteria
P27M10	ORF52	No significant hit
P27M10	ORF53	2e-58	AJQ29150	0.528	0.719	hypothetical protein JBW_03813	Pelosinus fermentans JBW45	Firmicutes
P27M10	ORF54	6e-19	AFU02981	0.467	0.617	NAD-dependent epimerase/dehydratase	Nocardia brasiliensis ATCC 700358	Actinobacteria
P27M10	ORF55	0	AEU38442	0.673	0.807	Phospholipase C	Granulicella mallensis MP5ACTX8	Acidobacteria
P27M10	ORF56	No significant hit
P27M10	ORF57	1e-97	ANM28957	0.353	0.516	hypothetical protein ABI59_04080	Acidobacteria bacterium Mor1	Acidobacteria
P27M10	ORF58	3e-81	ADW69471	0.403	0.56	hypothetical protein AciX9_2436	Granulicella tundricola MP5ACTX9	Acidobacteria
P27M10	ORF59	2e-126	AFL88671	0.394	0.557	hypothetical protein Terro_2415	Terriglobus roseus DSM 18391	Acidobacteria
P27M10	ORF60	0	ABJ86007	0.749	0.864	Mandelate racemase/muconate lactonizing enzyme N-terminal domain protein	Candidatus Solibacter usitatus Ellin6076	Acidobacteria
P27M10	ORF61	No significant hit
P27M10	ORF62	0	AFO02004	0.706	0.811	Sequence 8 from patent US 8097442		Others
P27M10	ORF63	7e-148	ALP53298	0.546	0.67	cyclopropane-fatty-acyl-phospholipid synthase	Candidatus Tenderia electrophaga	Proteobacteria
P27M10	ORF64	3e-135	GAO35088	0.547	0.66	geranylgeranyl reductase	Sulfuricella sp. T08	Proteobacteria
P27M10	ORF65	No significant hit
P27M10	ORF66	4e-18	AFE06807	0.396	0.667	hypothetical protein COCOR_06207	Corallococcus coralloides DSM 2259	Proteobacteria
P27M10	ORF67	1e-43	AMY09834	0.473	0.577	hypothetical protein LuPra_03060	Acidobacteria bacterium DSM 100886	Acidobacteria
P27M10	ORF68	2e-131	ACO34444	0.617	0.769	dihydrodipicolinate synthase	Acidobacterium capsulatum ATCC 51196	Acidobacteria
P27M10	ORF69	1e-124	AIY39800	0.519	0.676	Putative oxidoreductase in 4-hydroxyproline catabolic gene cluster	Collimonas arenae	Proteobacteria
P27M10	ORF70	5e-141	ACO33345	0.615	0.75	oxidoreductase FAD-dependent	Acidobacterium capsulatum ATCC 51196	Acidobacteria
P27M10	ORF71	2e-153	ACO34057	0.643	0.818	putative proline racemase	Acidobacterium capsulatum ATCC 51196	Acidobacteria
P27M10	ORF72	0	ABF41914	0.53	0.728	protein of unknown function DUF885	Candidatus Koribacter versatilis Ellin345	Acidobacteria

## Sheet: P28H1
Contigs ID	ORFs ID	E-value	Accession_number	% identity	% similarity	description	Genus and species affiliation for top BLASTx hit (if known)	Phylum
P28H1	ORF1	2e-12	ACI21494	0.362	0.523	conserved hypothetical protein	Thermodesulfovibrio yellowstonii DSM 11347	Nitrospira
P28H1	ORF2	No significant hit
P28H1	ORF3	No significant hit
P28H1	ORF4	2e-38	ABQ92114	0.307	0.457	hypothetical protein RoseRS_3760	Roseiflexus sp. RS-1	Chloroflexi
P28H1	ORF5	No significant hit
P28H1	ORF6	1e-131	AGB41556	0.448	0.647	ribosomal protein S12 methylthiotransferase RimO	Halobacteroides halobius DSM 5150	Firmicutes
P28H1	ORF7	1e-20	AEB15490	0.42	0.587	AAA ATPase central domain protein (plasmid)	Treponema succinifaciens DSM 2489	Spirochaetes
P28H1	ORF8	No significant hit
P28H1	ORF9	No significant hit
P28H1	ORF10	1e-39	EGJ30205	0.48	0.662	methyltransferase FkbM family	Moorea producens 3L	Cyanobacteria
P28H1	ORF11	8e-83	AEG58549	0.481	0.672	TIM-barrel protein nifR3 family	Desulfotomaculum ruminis DSM 2154	Firmicutes
P28H1	ORF12	No significant hit
P28H1	ORF13	1e-84	ADL08799	0.511	0.669	pantothenate kinase	Thermosediminibacter oceani DSM 16646	Firmicutes
P28H1	ORF14	1e-85	ABZ83920	0.431	0.583	ATP:guanido phosphotransferase putative	Heliobacterium modesticaldum Ice1	Firmicutes
P28H1	ORF15	2e-16	AEE95652	0.396	0.585	UvrB/UvrC protein	Mahella australiensis 50-1 BON	Firmicutes
P28H1	ORF16	7e-73	AMV72677	0.388	0.603	UDP-3-O-[3-hydroxymyristoyl] glucosamine N-acyltransferase	Desulfuromonas sp. DDH964	Proteobacteria
P28H1	ORF17	No significant hit
P28H1	ORF18	No significant hit
P28H1	ORF19	No significant hit
P28H1	ORF20	2e-119	AEF95838	0.757	0.862	phosphate ABC transporter ATPase subunit	Methanotorris igneus Kol 5	Others
P28H1	ORF21	5e-79	ALS20883	0.577	0.772	phosphate ABC transporter permease	Paenibacillus naphthalenovorans	Firmicutes
P28H1	ORF22	4e-116	ABW18663	0.572	0.777	phosphate ABC transporter inner membrane subunit PstC	Alkaliphilus oremlandii OhILAs	Firmicutes
P28H1	ORF23	3e-107	AFY85687	0.516	0.691	phosphate ABC transporter substrate-binding protein PhoT family	Chroococcidiopsis thermalis PCC 7203	Cyanobacteria
P28H1	ORF24	2e-25	GAP12420	0.538	0.731	phosphate transport regulator	Longilinea arvoryzae	Chloroflexi
P28H1	ORF25	1e-74	AGA27031	0.575	0.751	transcriptional regulator	Singulisphaera acidiphila DSM 18658	Planctomycetes
P28H1	ORF26	6e-38	BAT52169	0.455	0.634	glutathione-dependent formaldehyde-activating GFA	Nostoc sp. NIES-3756	Cyanobacteria
P28H1	ORF27	1e-17	AFG34934	0.335	0.537	transcriptional regulator	Fervidobacterium pennivorans DSM 9078	Thermotogae
P28H1	ORF28	3e-14	CCW35076	0.309	0.464	prepilin-type N-terminal cleavage/methylation domain	Chthonomonas calidirosea T49	Armatimonadetes
P28H1	ORF29	3e-110	ADB48915	0.357	0.544	hypothetical protein Cwoe_0480	Conexibacter woesei DSM 14684	Actinobacteria
P28H1	ORF30	1e-15	BAL53837	0.399	0.565	hypothetical conserved protein	uncultured Acidobacteria bacterium	Acidobacteria
P28H1	ORF31	0	AKP54164	0.602	0.756	Fumarate reductase/succinate dehydrogenase flavoprotein domain protein	Cyclobacterium amurskyense	Bacteroidetes
P28H1	ORF32	9e-46	BAV48888	0.727	0.828	transcription regulator protein	Mesorhizobium loti	Proteobacteria
P28H1	ORF33	5e-53	AGP35608	0.608	0.748	hypothetical protein SCE1572_14355	Sorangium cellulosum So0157-2	Proteobacteria
P28H1	ORF34	3e-37	AGP35608	0.556	0.697	hypothetical protein SCE1572_14355	Sorangium cellulosum So0157-2	Proteobacteria
P28H1	ORF35	5e-15	AIQ31439	0.259	0.457	hypothetical protein P40081_27210	Paenibacillus sp. FSL P4-0081	Firmicutes
P28H1	ORF36	No significant hit
P28H1	ORF37	9e-09	CCW36051	0.256	0.406	prepilin-type N-terminal cleavage/methylation domain	Chthonomonas calidirosea T49	Armatimonadetes
P28H1	ORF38	6e-65	ACX65662	0.314	0.48	hypothetical protein GYMC10_3424	Paenibacillus sp. Y412MC10	Firmicutes
P28H1	ORF39	1e-57	ANX13984	0.331	0.545	hypothetical protein ABE41_018385	Fictibacillus arsenicus	Firmicutes
P28H1	ORF40	1e-136	AMV39261	0.53	0.69	Acetyl xylan esterase (AXE1)	Planctomyces sp. SH-PL62	Planctomycetes
P28H1	ORF41	6e-39	AHL33261	0.517	0.699	GTP pyrophosphokinase	Pseudomonas brassicacearum	Proteobacteria
P28H1	ORF42	0.001	BAE52056	0.392	0.554	hypothetical protein	Magnetospirillum magneticum AMB-1	Proteobacteria
P28H1	ORF43	3e-36	AKB83451	0.492	0.717	hypothetical protein MSBR3_2873	Methanosarcina barkeri 3	Others
P28H1	ORF44	2e-44	AFE07421	0.372	0.578	hypothetical protein COCOR_07244	Corallococcus coralloides DSM 2259	Proteobacteria
P28H1	ORF45	1e-71	ACO04752	0.498	0.709	pyridoxal phosphate enzyme YggS family	Persephonella marina EX-H1	Aquificae
P28H1	ORF46	4e-13	BAL56707	0.422	0.627	hypothetical conserved protein	uncultured prokaryote	Others
P28H1	ORF47	6e-88	AGB40817	0.513	0.717	pyrroline-5-carboxylate reductase	Halobacteroides halobius DSM 5150	Firmicutes
P28H1	ORF48	9e-16	ADB53620	0.556	0.722	protein of unknown function DUF167	Conexibacter woesei DSM 14684	Actinobacteria
P28H1	ORF49	No significant hit
P28H1	ORF50	3e-137	CCW36317	0.565	0.73	ATPases of the AAA+ class	Chthonomonas calidirosea T49	Armatimonadetes
P28H1	ORF51	2e-59	ALS29227	0.391	0.609	histidine kinase	Paenibacillus sp. 32O-W	Firmicutes
P28H1	ORF52	4e-77	AHF89002	0.473	0.625	2-dehydropantoate 2-reductase	Opitutaceae bacterium TAV5	Verrucomicrobia
P28H1	ORF53	2e-171	ACM20009	0.805	0.893	sulfate ABC transporter periplasmic sulfate-binding protein	Geobacter daltonii FRC-32	Proteobacteria
P28H1	ORF54	2e-114	BAC90014	0.712	0.846	sulfate ABC transporter permease protein	Gloeobacter violaceus PCC 7421	Cyanobacteria
P28H1	ORF55	1e-101	AGY60122	0.797	0.896	sulfate ABC transporter inner membrane subunit CysW	Gloeobacter kilaueensis JS1	Cyanobacteria
P28H1	ORF56	3e-121	AKH38739	0.607	0.766	sulfate ABC transporter ATP-binding protein	Nitrosomonas communis	Proteobacteria
P28H1	ORF57	1e-06	AMF45185	0.291	0.41	Sequence 5280 from patent US 9073990		Others
P28H1	ORF58	4e-161	ABM24356	0.544	0.691	oxidoreductase domain protein	Shewanella sp. W3-18-1	Proteobacteria
P28H1	ORF59	8e-95	AJY70113	0.552	0.727	inorganic phosphate transporter	Geobacter sulfurreducens	Proteobacteria
P28H1	ORF60	3e-20	AII58824	0.432	0.593	phosphate transport regulator	Dehalococcoides mccartyi CG4	Chloroflexi
P28H1	ORF61	4e-11	AKO94146	0.694	0.917	phosphate ABC transporter ATP-binding protein	Bacillus endophyticus	Firmicutes
P28H1	ORF62	3e-39	AIF50036	0.481	0.705	phosphate uptake regulator PhoU	Pelosinus sp. UFO1	Firmicutes
P28H1	ORF63	2e-25	ABR47791	0.306	0.47	polysaccharide deacetylase	Alkaliphilus metalliredigens QYMF	Firmicutes
P28H1	ORF64	No significant hit
P28H1	ORF65	4e-146	ABG03711	0.586	0.757	UBA/THIF-type NAD/FAD binding fold	Rubrobacter xylanophilus DSM 9941	Actinobacteria
P28H1	ORF66	No significant hit
P28H1	ORF67	9e-113	AIE86008	0.469	0.636	two-component system sensor protein	Fimbriimonas ginsengisoli Gsoil 348	Armatimonadetes
P28H1	ORF68	1e-137	AIE86007	0.6	0.756	response regulator receiver modulated metal dependent phosphohydrolase	Fimbriimonas ginsengisoli Gsoil 348	Armatimonadetes
P28H1	ORF69	3e-58	AMW03854	0.365	0.516	hypothetical protein GEMMAAP_01350	Gemmatimonas phototrophica	Gemmatimonadetes
P28H1	ORF70	2e-108	AIE83908	0.388	0.551	hypothetical protein OP10G_0540	Fimbriimonas ginsengisoli Gsoil 348	Armatimonadetes
P28H1	ORF71	No significant hit
P28H1	ORF72	1e-15	BAM03042	0.281	0.438	hypothetical protein PSMK_08830	Phycisphaera mikurensis NBRC 102666	Planctomycetes
P28H1	ORF73	No significant hit
P28H1	ORF74	2e-08	EBV80598	0.337	0.485	hypothetical protein GOS_6847877 partial	marine metagenome	Others
P28H1	ORF75	No significant hit
P28H1	ORF76	2e-27	ALS28047	0.291	0.504	GntR family transcriptional regulator	Paenibacillus sp. 32O-W	Firmicutes
P28H1	ORF77	2e-143	BAM03927	0.485	0.668	hypothetical protein PSMK_17680	Phycisphaera mikurensis NBRC 102666	Planctomycetes
P28H1	ORF78	1e-147	ABB14178	0.546	0.716	DNA translocase FtsK	Carboxydothermus hydrogenoformans Z-2901	Firmicutes
P28H1	ORF79	0	BAL57609	0.515	0.689	type IV pilus assembly protein PilB	uncultured prokaryote	Others
P28H1	ORF80	2e-143	CCW35009	0.652	0.803	pilus retraction protein PilT	Chthonomonas calidirosea T49	Armatimonadetes
P28H1	ORF81	9e-133	AIE85767	0.535	0.72	Type II secretion system F domain protein	Fimbriimonas ginsengisoli Gsoil 348	Armatimonadetes
P28H1	ORF82	1e-32	CBV34867	0.358	0.524	unnamed protein product	Desulfuromonas acetoxidans DSM 684	Proteobacteria
P28H1	ORF83	No significant hit
P28H1	ORF84	No significant hit
P28H1	ORF85	2e-36	AIA11064	0.31	0.457	Unknown Function partial	uncultured bacterium	Others
P28H1	ORF86	No significant hit
P28H1	ORF87	No significant hit
P28H1	ORF88	No significant hit
P28H1	ORF89	No significant hit
P28H1	ORF90	3e-61	AFY33338	0.488	0.638	polysaccharide deacetylase	Calothrix sp. PCC 7507	Cyanobacteria
P28H1	ORF91	2e-14	AHJ28771	0.42	0.614	Cytochrome b6-f complex alternative Rieske iron sulfur protein PetC3	Nodularia spumigena CCY9414	Cyanobacteria
P28H1	ORF92	3e-53	CCW34561	0.5	0.691	hypothetical protein CCALI_00736	Chthonomonas calidirosea T49	Armatimonadetes
P28H1	ORF93	5e-85	EDX73876	0.459	0.655	NAD binding domain of 6-phosphogluconate dehydrogenase family	Coleofasciculus chthonoplastes PCC 7420	Cyanobacteria
P28H1	ORF94	3e-109	ACN98776	0.588	0.787	conserved hypothetical protein	Sulfurihydrogenibium azorense Az-Fu1	Aquificae
P28H1	ORF95	3e-67	ECP23836	0.498	0.684	hypothetical protein GOS_5782868	marine metagenome	Others
P28H1	ORF96	5e-24	EBG59802	0.464	0.619	hypothetical protein GOS_9406388	marine metagenome	Others
P28H1	ORF97	4e-144	CCW35359	0.385	0.54	hypothetical protein CCALI_01543	Chthonomonas calidirosea T49	Armatimonadetes
P28H1	ORF98	3e-34	AGP33844	0.569	0.733	ArsR family transcriptional regulator	Sorangium cellulosum So0157-2	Proteobacteria
P28H1	ORF99	0	ABQ90306	0.769	0.885	arsenical-resistance protein	Roseiflexus sp. RS-1	Chloroflexi
P28H1	ORF100	3e-38	AMV30435	0.447	0.625	hypothetical protein VT84_38940	Gemmata sp. SH-PL17	Planctomycetes
P28H1	ORF101	No significant hit
P28H1	ORF102	1e-68	EDE36319	0.456	0.583	hypothetical protein GOS_1143755	marine metagenome	Others
P28H1	ORF103	9e-95	CCH87343	0.428	0.599	conserved exported protein of unknown function	Modestobacter marinus	Actinobacteria
P28H1	ORF104	1e-11	CCW34219	0.312	0.468	prepilin-type N-terminal cleavage/methylation domain	Chthonomonas calidirosea T49	Armatimonadetes
P28H1	ORF105	7e-11	SCF12091	0.338	0.541	3-oxoacyl-acyl-carrier-protein	Micromonospora coriariae	Actinobacteria
P28H1	ORF106	2e-90	CAJ74368	0.427	0.608	strongly similar to beta-ketoacyl acyl carrier protein synthase II	Candidatus Kuenenia stuttgartiensis	Planctomycetes
P28H1	ORF107	2e-45	AKT40264	0.3	0.444	uncharacterized protein CMC5_044170	Chondromyces crocatus	Proteobacteria
P28H1	ORF108	No significant hit
P28H1	ORF109	6e-56	EBF63756	0.425	0.578	hypothetical protein GOS_9565210	marine metagenome	Others
P28H1	ORF110	1e-70	AKC65953	0.502	0.694	3-oxoacyl-ACP reductase	Bacillus pumilus	Firmicutes
P28H1	ORF111	7e-40	ABJ87633	0.516	0.726	holo-acyl-carrier-protein synthase	Candidatus Solibacter usitatus Ellin6076	Acidobacteria
P28H1	ORF112	No significant hit
P28H1	ORF113	3e-06	ACV59152	0.55	0.79	2-oxoglutarate dehydrogenase, E2 subunit, dihydrolipoamide succinyltransferase	Alicyclobacillus acidocaldarius subsp. acidocaldarius	Firmicutes
P28H1	ORF114	No significant hit
P28H1	ORF115	4e-33	AKV04459	0.404	0.543	glycosyl transferase family 2	Labilithrix luteola	Proteobacteria
P28H1	ORF116	8e-91	GAK59129	0.426	0.594	hypothetical protein U27_06105	bacterium UASB270	Others

## Sheet: P28I7
Contigs ID	ORFs ID	E-value	Accession_number	% identity	% similarity	description	Genus and species affiliation for top BLASTx hit (if known)	Phylum
P28I7	ORF1	No significant hit
P28I7	ORF2	0	ABF39798	0.81	0.881	Fe-S protein radical SAM family	Candidatus Koribacter versatilis Ellin345	Acidobacteria
P28I7	ORF3	No significant hit
P28I7	ORF4	0	ABF40493	0.65	0.781	endothelin-converting enzyme	Candidatus Koribacter versatilis Ellin345	Acidobacteria
P28I7	ORF5	6e-128	CBE70068	0.596	0.746	putative alcohol dehydrogenase	Candidatus Methylomirabilis oxyfera	candidate division NC10
P28I7	ORF6	0	ACO33433	0.607	0.772	chloride transporter ClC family	Acidobacterium capsulatum ATCC 51196	Acidobacteria
P28I7	ORF7	7e-27	ACO34010	0.286	0.437	hypothetical protein ACP_0083	Acidobacterium capsulatum ATCC 51196	Acidobacteria
P28I7	ORF8	2e-59	ACS89699	0.389	0.584	Ornithine cyclodeaminase	Thermococcus sibiricus MM 739	Others
P28I7	ORF9	3e-95	AEU37084	0.568	0.716	esterase	Granulicella mallensis MP5ACTX8	Acidobacteria
P28I7	ORF10	1e-149	ADW69182	0.684	0.797	glutathione synthase/ribosomal protein S6 modification glutaminyl transferase-like protein	Granulicella tundricola MP5ACTX9	Acidobacteria
P28I7	ORF11	0	ABJ84893	0.707	0.859	uncharacterized enzyme	Candidatus Solibacter usitatus Ellin6076	Acidobacteria
P28I7	ORF12	4e-167	ABJ84892	0.667	0.822	aminopeptidase	Candidatus Solibacter usitatus Ellin6076	Acidobacteria
P28I7	ORF13	2e-70	AEU37077	0.54	0.679	hypothetical protein AciX8_2767	Granulicella mallensis MP5ACTX8	Acidobacteria
P28I7	ORF14	2e-38	ABJ84891	0.646	0.778	hypothetical protein Acid_3924	Candidatus Solibacter usitatus Ellin6076	Acidobacteria
P28I7	ORF15	2e-120	ABF40055	0.354	0.511	serine/threonine protein kinase with TPR repeats	Candidatus Koribacter versatilis Ellin345	Acidobacteria
P28I7	ORF16	0	ABF42335	0.481	0.626	conserved hypothetical protein	Candidatus Koribacter versatilis Ellin345	Acidobacteria
P28I7	ORF17	0	ABF42334	0.615	0.784	amino acid/polyamine/organocation transporter APC superfamily	Candidatus Koribacter versatilis Ellin345	Acidobacteria
P28I7	ORF18	8e-84	AFZ17040	0.474	0.685	arabinose efflux permease family protein	Microcoleus sp. PCC 7113	Cyanobacteria
P28I7	ORF19	3e-64	AMV23900	0.437	0.585	Ycf48-like protein	Gemmata sp. SH-PL17	Planctomycetes
P28I7	ORF20	2e-69	ABF42333	0.581	0.747	hypothetical protein Acid345_3332	Candidatus Koribacter versatilis Ellin345	Acidobacteria
P28I7	ORF21	3e-38	SCK25204	0.308	0.444	hypothetical protein VAR608DRAFT_2022	Variovorax sp. HW608	Proteobacteria
P28I7	ORF22	No significant hit
P28I7	ORF23	5e-73	AFL89430	0.497	0.649	homoserine kinase	Terriglobus roseus DSM 18391	Acidobacteria
P28I7	ORF24	1e-175	ADV82016	0.581	0.748	threonine synthase	Terriglobus saanensis SP1PR4	Acidobacteria
P28I7	ORF25	4e-46	ABF40370	0.579	0.781	conserved hypothetical protein Cupin barrel	Candidatus Koribacter versatilis Ellin345	Acidobacteria
P28I7	ORF26	1e-76	ABJ87312	0.333	0.539	amidohydrolase 2	Candidatus Solibacter usitatus Ellin6076	Acidobacteria
P28I7	ORF27	2e-122	ABJ81380	0.487	0.635	aminotransferase	Candidatus Solibacter usitatus Ellin6076	Acidobacteria
P28I7	ORF28	5e-25	AEU36973	0.35	0.571	alkylhydroperoxidase like protein AhpD family	Granulicella mallensis MP5ACTX8	Acidobacteria
P28I7	ORF29	2e-139	AEP13262	0.331	0.473	Cna protein B-type domain TonB-dependent Receptor Plug Domain protein	Chloracidobacterium thermophilum B	Acidobacteria
P28I7	ORF30	1e-91	ACO34163	0.525	0.697	oxidoreductase short chain dehydrogenase/reductase family	Acidobacterium capsulatum ATCC 51196	Acidobacteria
P28I7	ORF31	3e-129	GAP07734	0.631	0.767	branched chain amino acid aminotransferase apoenzyme	Anaerolinea thermolimosa	Chloroflexi
P28I7	ORF32	5e-117	BAL55052	0.481	0.642	cystathionine gamma-lyase	uncultured Acidobacteria bacterium	Acidobacteria
P28I7	ORF33	0	ABF42909	0.548	0.681	TonB-dependent receptor	Candidatus Koribacter versatilis Ellin345	Acidobacteria
P28I7	ORF34	2e-161	ABF40633	0.621	0.818	transcriptional regulator LacI family	Candidatus Koribacter versatilis Ellin345	Acidobacteria
P28I7	ORF35	1e-36	ABF39915	0.295	0.505	Tetratricopeptide repeat protein	Candidatus Koribacter versatilis Ellin345	Acidobacteria
P28I7	ORF36	1e-159	ABF41758	0.605	0.772	ABC efflux pump inner membrane subunit	Candidatus Koribacter versatilis Ellin345	Acidobacteria
P28I7	ORF37	1e-152	ABF40507	0.571	0.759	ABC efflux pump inner membrane subunit	Candidatus Koribacter versatilis Ellin345	Acidobacteria
P28I7	ORF38	9e-76	BAL58144	0.456	0.62	chorismate synthase	uncultured Acidobacteria bacterium	Acidobacteria
P28I7	ORF39	4e-71	ACU63682	0.396	0.531	hypothetical protein Cpin_6276	Chitinophaga pinensis DSM 2588	Bacteroidetes
P28I7	ORF40	0	ABF39430	0.739	0.848	conserved hypothetical protein	Candidatus Koribacter versatilis Ellin345	Acidobacteria
P28I7	ORF41	2e-101	ABF39429	0.563	0.711	TPR repeat protein	Candidatus Koribacter versatilis Ellin345	Acidobacteria
P28I7	ORF42	0	ABF39428	0.5	0.64	hypothetical protein Acid345_0423	Candidatus Koribacter versatilis Ellin345	Acidobacteria
P28I7	ORF43	1e-110	ABF39288	0.654	0.817	transcriptional regulator GntR family	Candidatus Koribacter versatilis Ellin345	Acidobacteria
P28I7	ORF44	0	ABF42494	0.564	0.713	Beta-N-acetylhexosaminidase	Candidatus Koribacter versatilis Ellin345	Acidobacteria
P28I7	ORF45	0.0001	AGK76962	0.324	0.524	Stage II sporulation protein	Streptomyces fulvissimus DSM 40593	Actinobacteria
P28I7	ORF46	1e-08	AHG91442	0.763	0.868	4-hydroxybenzoate polyprenyltransferase	Gemmatirosa kalamazoonesis	Gemmatimonadetes
P28I7	ORF47	7e-14	ALS23581	0.402	0.621	thiol-disulfide oxidoreductase	Paenibacillus naphthalenovorans	Firmicutes
P28I7	ORF48	0	ALF52731	0.7	0.827	pyruvate-flavodoxin oxidoreductase	Nostoc piscinale CENA21	Cyanobacteria
P28I7	ORF49	4e-154	BAU06814	0.648	0.83	dihydroorotate dehydrogenase 2	Fischerella sp. NIES-3754	Cyanobacteria
P28I7	ORF50	0	ADW69915	0.456	0.635	diguanylate cyclase and metal dependent phosphohydrolase	Granulicella tundricola MP5ACTX9	Acidobacteria
P28I7	ORF51	0	ABF39432	0.641	0.803	Cellulase precursor	Candidatus Koribacter versatilis Ellin345	Acidobacteria
P28I7	ORF52	5e-16	ABF42261	0.822	0.911	glycosyl transferase group 1	Candidatus Koribacter versatilis Ellin345	Acidobacteria
P28I7	ORF53	4e-106	ABF42261	0.537	0.752	glycosyl transferase group 1	Candidatus Koribacter versatilis Ellin345	Acidobacteria
P28I7	ORF54	No significant hit
P28I7	ORF55	0	ABF40931	0.809	0.909	peptidase S9 prolyl oligopeptidase	Candidatus Koribacter versatilis Ellin345	Acidobacteria
P28I7	ORF56	1e-16	AAB89245	0.25	0.405	heme biosynthesis protein (nirJ-2)	Archaeoglobus fulgidus DSM 4304	Others
P28I7	ORF57	1e-119	ABF39736	0.475	0.576	Phospholipase C	Candidatus Koribacter versatilis Ellin345	Acidobacteria
P28I7	ORF58	1e-27	GAK57195	0.541	0.721	fibronectin type III domain protein	bacterium UASB270	Others
P28I7	ORF59	1e-13	AGG05677	0.696	0.87	hypothetical protein dcmb_41	Dehalococcoides mccartyi DCMB5	Chloroflexi
P28I7	ORF60	0	ABF42521	0.767	0.888	acetyl-coenzyme A synthetase	Candidatus Koribacter versatilis Ellin345	Acidobacteria
P28I7	ORF61	2e-30	ABF41333	0.511	0.65	hypothetical protein Acid345_2332	Candidatus Koribacter versatilis Ellin345	Acidobacteria
P28I7	ORF62	2e-38	ABJ81699	0.48	0.67	RNA polymerase, sigma-24 subunit, ECF subfamily	Candidatus Solibacter usitatus Ellin6076	Acidobacteria
P28I7	ORF63	No significant hit
P28I7	ORF64	2e-21	ACO32724	0.382	0.574	hypothetical protein ACP_2749	Acidobacterium capsulatum ATCC 51196	Acidobacteria
P28I7	ORF65	1e-135	ABF41236	0.758	0.905	phosphoribosylformylglycinamidine synthase subunit I	Candidatus Koribacter versatilis Ellin345	Acidobacteria
P28I7	ORF66	8e-118	ABF42653	0.573	0.721	oxidoreductase	Candidatus Koribacter versatilis Ellin345	Acidobacteria
P28I7	ORF67	No significant hit
P28I7	ORF68	No significant hit
P28I7	ORF69	No significant hit
P28I7	ORF70	No significant hit
P28I7	ORF71	7e-11	ACO34528	0.566	0.698	two-component response regulator	Acidobacterium capsulatum ATCC 51196	Acidobacteria
P28I7	ORF72	3e-97	ABJ86501	0.705	0.797	major intrinsic protein	Candidatus Solibacter usitatus Ellin6076	Acidobacteria
P28I7	ORF73	5e-53	ABL82591	0.537	0.742	conserved hypothetical protein	Nocardioides sp. JS614	Actinobacteria
P28I7	ORF74	0	ABL82591	0.579	0.744	conserved hypothetical protein	Nocardioides sp. JS614	Actinobacteria
P28I7	ORF75	2e-12	ACO33966	0.475	0.661	putative IS200 family transposase	Acidobacterium capsulatum ATCC 51196	Acidobacteria
P28I7	ORF76	No significant hit
P28I7	ORF77	0	ABF40100	0.874	0.933	chaperonin GroEL	Candidatus Koribacter versatilis Ellin345	Acidobacteria
P28I7	ORF78	3e-46	ADW68388	0.789	0.895	Chaperonin Cpn10	Granulicella tundricola MP5ACTX9	Acidobacteria
P28I7	ORF79	1e-14	ANA40944	0.42	0.739	sulfurtransferase	Geobacter anodireducens	Proteobacteria
P28I7	ORF80	2e-28	ACO34291	0.42	0.587	putative cytochrome c family protein	Acidobacterium capsulatum ATCC 51196	Acidobacteria
P28I7	ORF81	No significant hit
P28I7	ORF82	No significant hit
P28I7	ORF83	2e-05	SCK39941	0.336	0.443	Predicted membrane protein	Variovorax sp. HW608	Proteobacteria
P28I7	ORF84	No significant hit
P28I7	ORF85	1e-125	ABJ85120	0.759	0.85	conserved hypothetical protein	Candidatus Solibacter usitatus Ellin6076	Acidobacteria
P28I7	ORF86	0	BAC89248	0.584	0.729	gll1307	Gloeobacter violaceus PCC 7421	Cyanobacteria
P28I7	ORF87	0	ABJ86291	0.783	0.873	hypothetical protein Acid_5342	Candidatus Solibacter usitatus Ellin6076	Acidobacteria
P28I7	ORF88	No significant hit
P28I7	ORF89	No significant hit
P28I7	ORF90	1e-27	ABF40106	0.531	0.786	hypothetical protein Acid345_1103	Candidatus Koribacter versatilis Ellin345	Acidobacteria
P28I7	ORF91	6e-14	ADP84725	0.294	0.479	hypothetical protein FraEuI1c_6756	Frankia sp. EuI1c	Actinobacteria
P28I7	ORF92	4e-71	ABF43097	0.478	0.617	phosphoesterase	Candidatus Koribacter versatilis Ellin345	Acidobacteria
P28I7	ORF93	0	ABF41371	0.694	0.836	beta-ketoacyl synthase	Candidatus Koribacter versatilis Ellin345	Acidobacteria
P28I7	ORF94	3e-71	ABF90714	0.463	0.565	conserved hypothetical protein	Myxococcus xanthus DK 1622	Proteobacteria
P28I7	ORF95	4e-119	ABF41432	0.635	0.784	GHMP kinase	Candidatus Koribacter versatilis Ellin345	Acidobacteria
P28I7	ORF96	4e-26	ABF42975	0.338	0.504	glycosyl transferase family 39	Candidatus Koribacter versatilis Ellin345	Acidobacteria
P28I7	ORF97	5e-169	AKJ05894	0.6	0.747	Aromatic-L-amino-acid decarboxylase	Archangium gephyra	Proteobacteria
P28I7	ORF98	No significant hit
P28I7	ORF99	1e-69	ABF42646	0.575	0.703	protein of unknown function DUF480	Candidatus Koribacter versatilis Ellin345	Acidobacteria
P28I7	ORF100	9e-126	ACL45875	0.528	0.698	major facilitator superfamily MFS_1	Cyanothece sp. PCC 7425	Cyanobacteria
P28I7	ORF101	2e-54	ABA24455	0.548	0.684	gluconate kinase SKI family	Anabaena variabilis ATCC 29413	Cyanobacteria
P28I7	ORF102	No significant hit
P28I7	ORF103	4e-11	ADW68092	0.321	0.571	hypothetical protein AciX9_1029	Granulicella tundricola MP5ACTX9	Acidobacteria
P28I7	ORF104	6e-21	AFL89115	0.391	0.512	outer membrane protein/peptidoglycan-associated (lipo)protein	Terriglobus roseus DSM 18391	Acidobacteria

[truncated: 17 more sheets: P28L21, P2P12, P31G24, P35B14, P36M1, P37A11, P37O10, P3A13, P43A3, P46O24, P49M4, P5A4, P5C24, P6L5, P6L4, P6B5, P9L21]
